# Supplementary material for: Anti-Proliferative Effects of Iridoids from Valeriana fauriei on Cancer Stem Cells
Source: MDPI journal article supplement (doi:10.3390/ijms232214206), 2022-11-17
Supplement: s1 [file s1]

## Supplementary Materials

Anti-proliferative effects on cancer stem cells of derivatives of iridoid glucosides

isolated from *Valeriana fauriei*

Hayato Yoshikawa<sup>1</sup>, Takahiro Matsumoto<sup>1\*</sup>, Takahiro Kitagawa<sup>1</sup>, Tomoe Ohta<sup>2</sup>, and  
Tatsusada Yoshida<sup>2</sup>, Tetsushi Watanabe<sup>a\*</sup>

<sup>1</sup>*Kyoto Pharmaceutical University, 1 Misasagi-Shichono-cho, Yamashina-ku, Kyoto  
607-8412, Japan.*

<sup>2</sup>*Faculty of Pharmaceutical Sciences, Nagasaki International University, Nagasaki 859-  
3298, Japan*

### List of Supplementary Materials

- S1. <sup>1</sup>H NMR spectra of new compounds **1–3**, **6**, **6a**, **7**, **9**, and **12**
- S2. <sup>13</sup>C NMR spectra of new compounds **1–3**, **6**, **6a**, **7**, **9**, and **12**
- S3. 2D NMR spectra of new compounds **1–3**, **6**, **6a**, **7**, **9**, and **12**
- S4. Optimized geometries, the minimum value of frequency, relative free-energies, and Boltzmann distributions of conformers of **1a**, **6a**, and **9a**.
- S5. Anti-proliferative activity of **1a**, **6a**, and **9a** against non-CSCs and CSCs from MDA-MB-231 cells.

**S1.  $^1\text{H}$  NMR spectra of new compounds 1–3, 6, 6a, 7, 9, and 12**

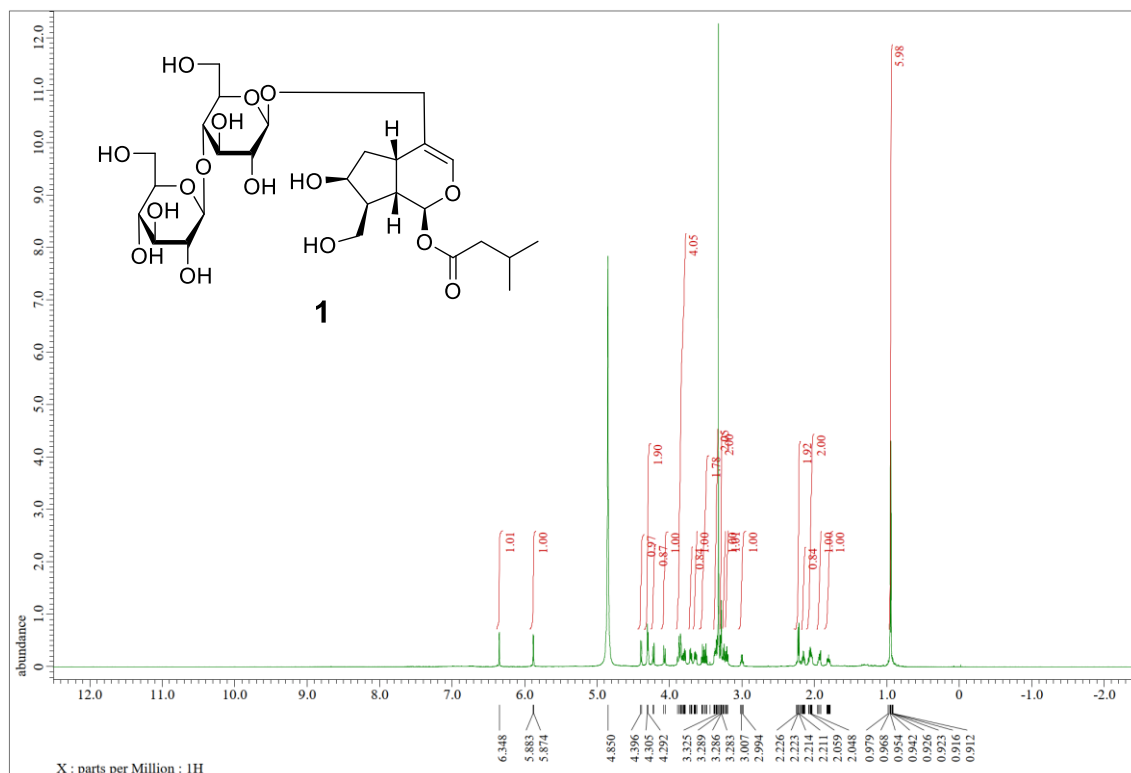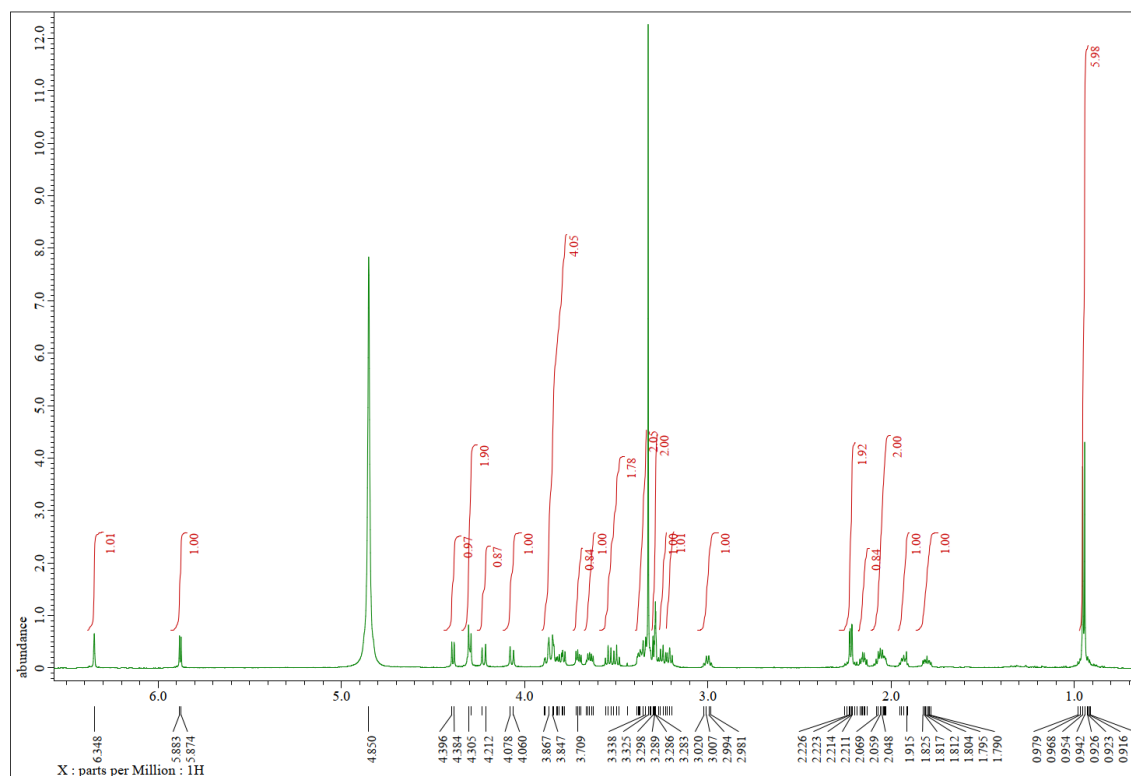

**$^1\text{H}$  NMR spectrum of 1**

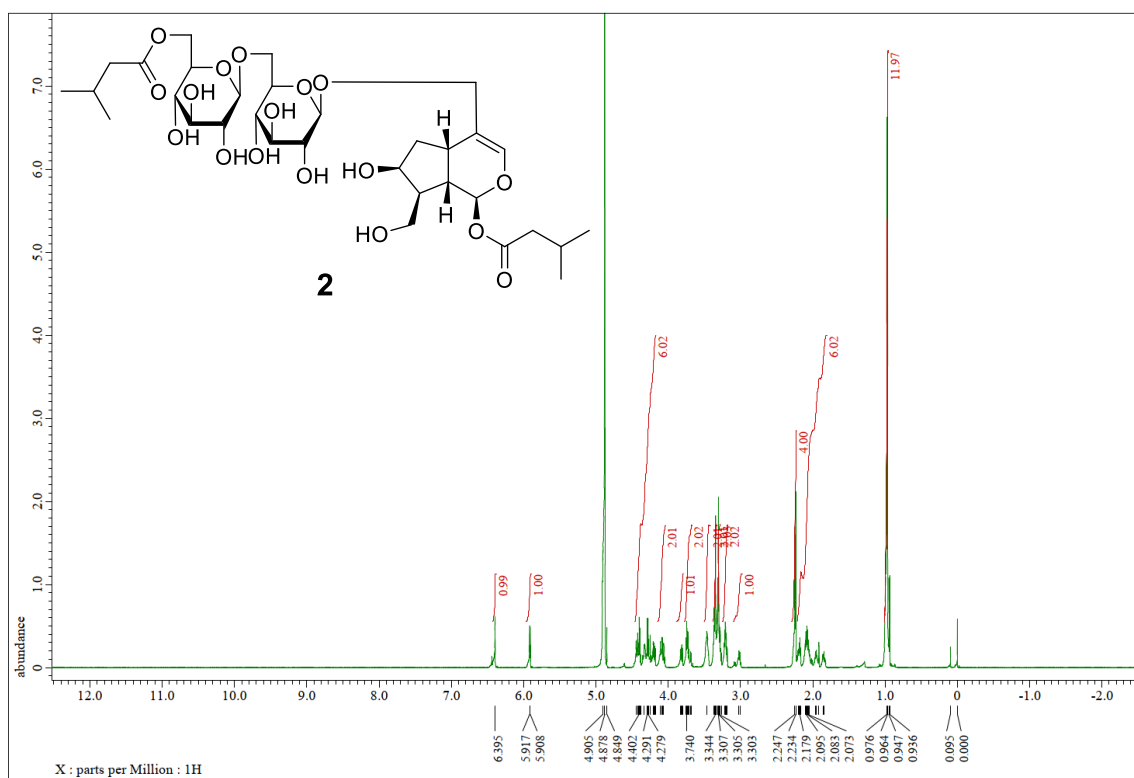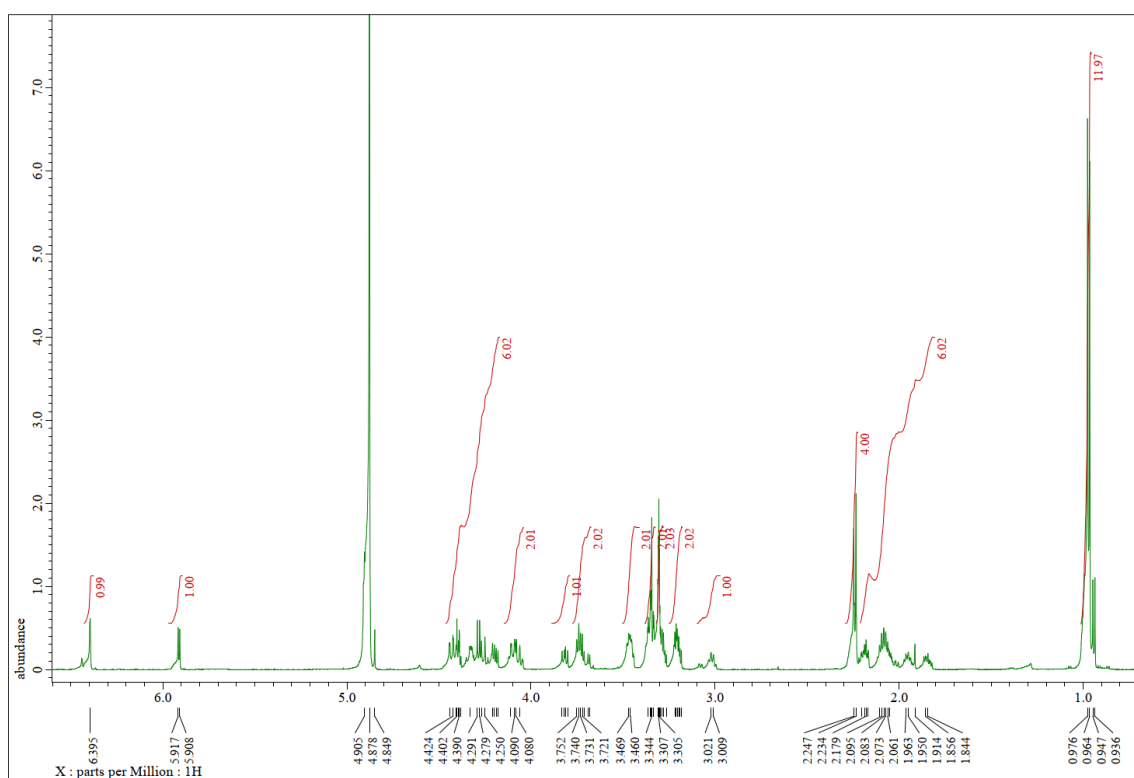

$^1\text{H}$  NMR spectrum of **2**

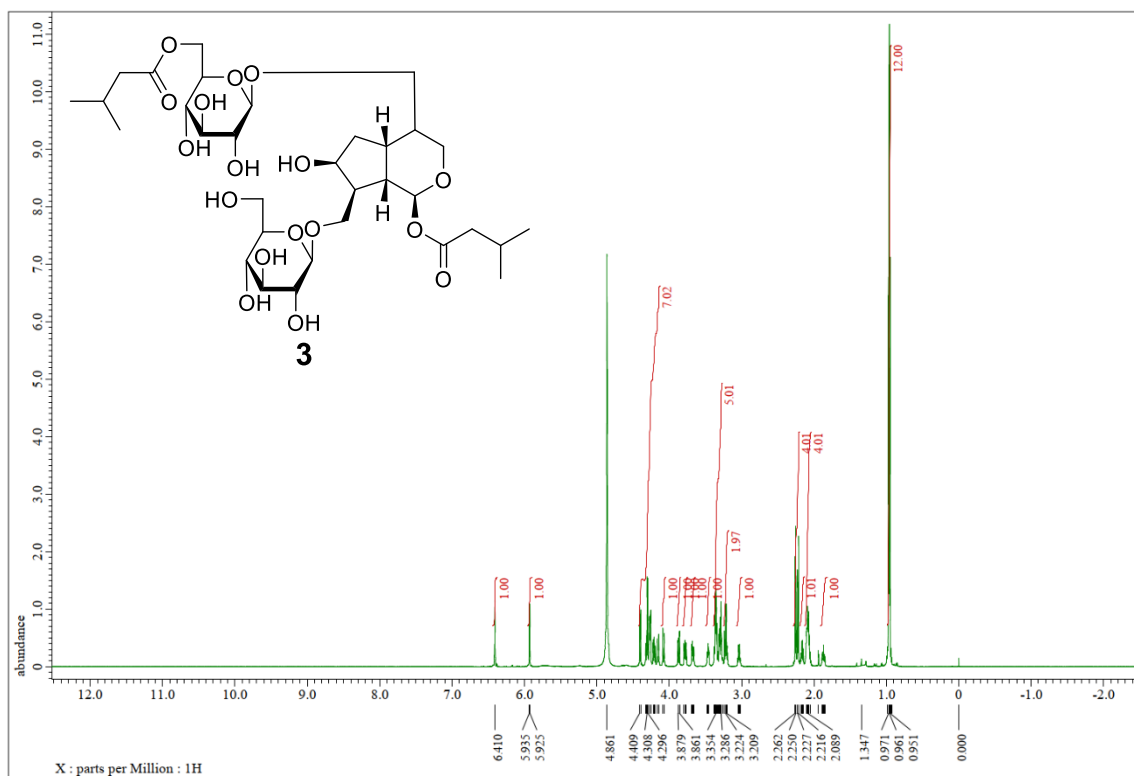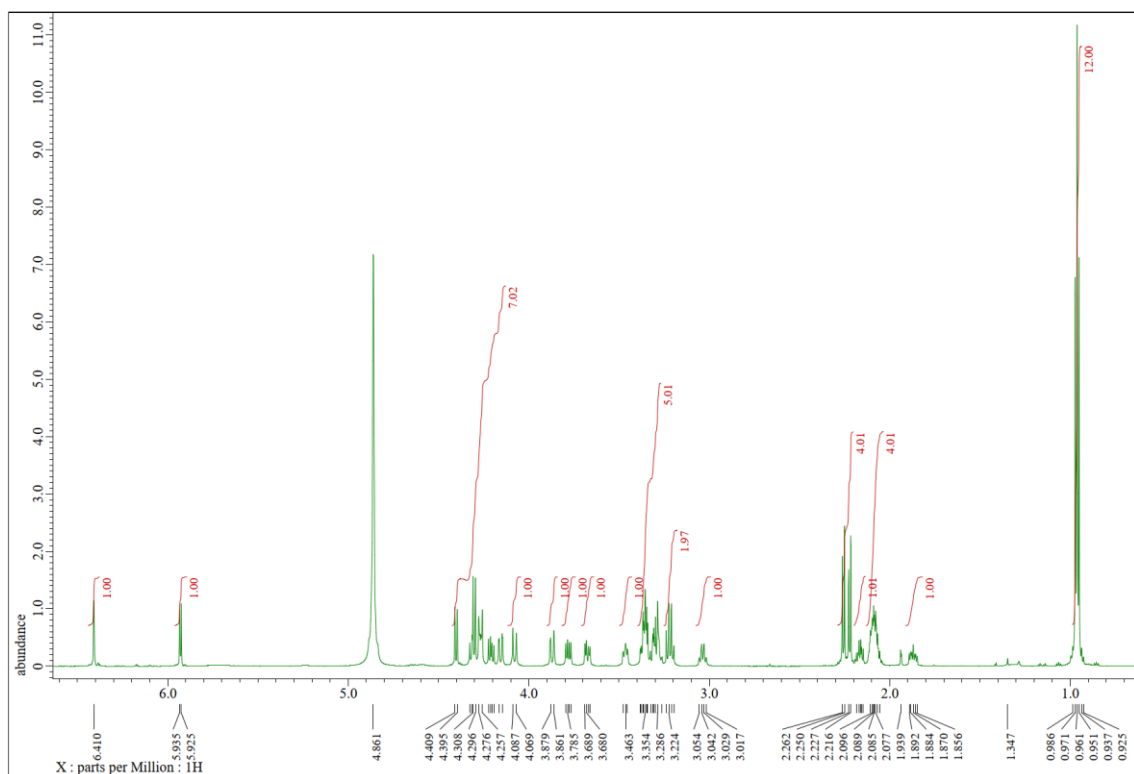

$^1\text{H}$  NMR spectrum of **3**

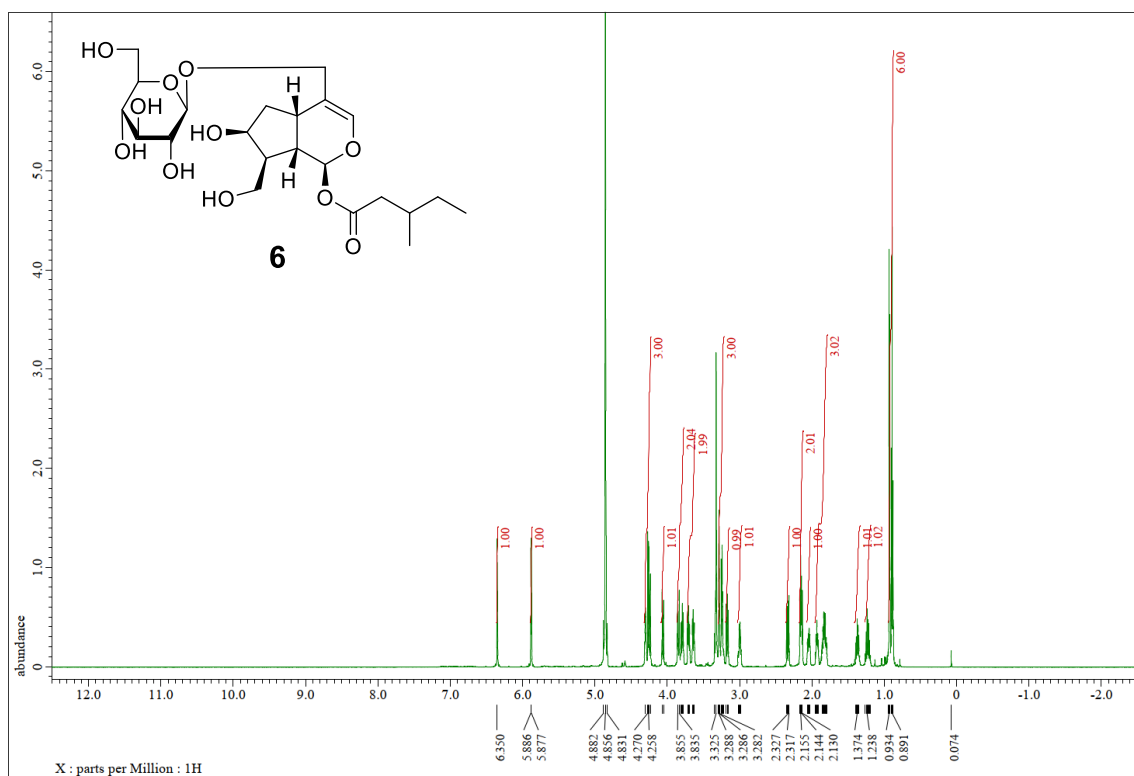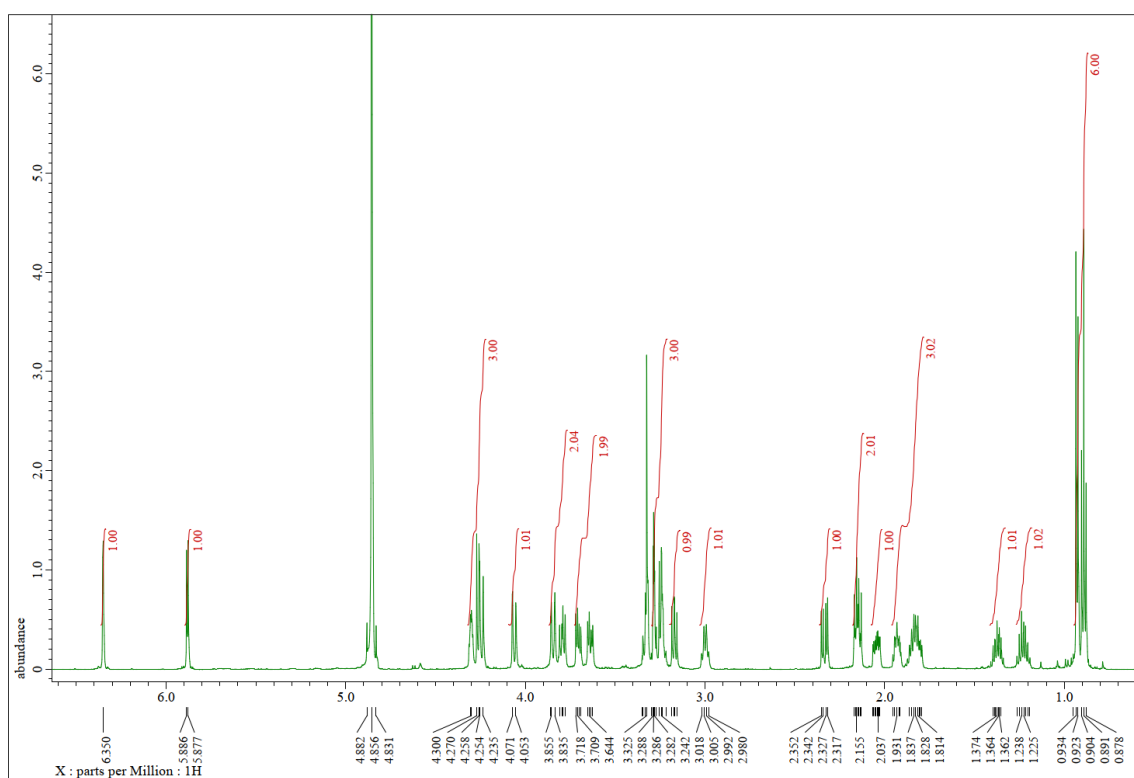

$^1\text{H}$  NMR spectrum of **6**

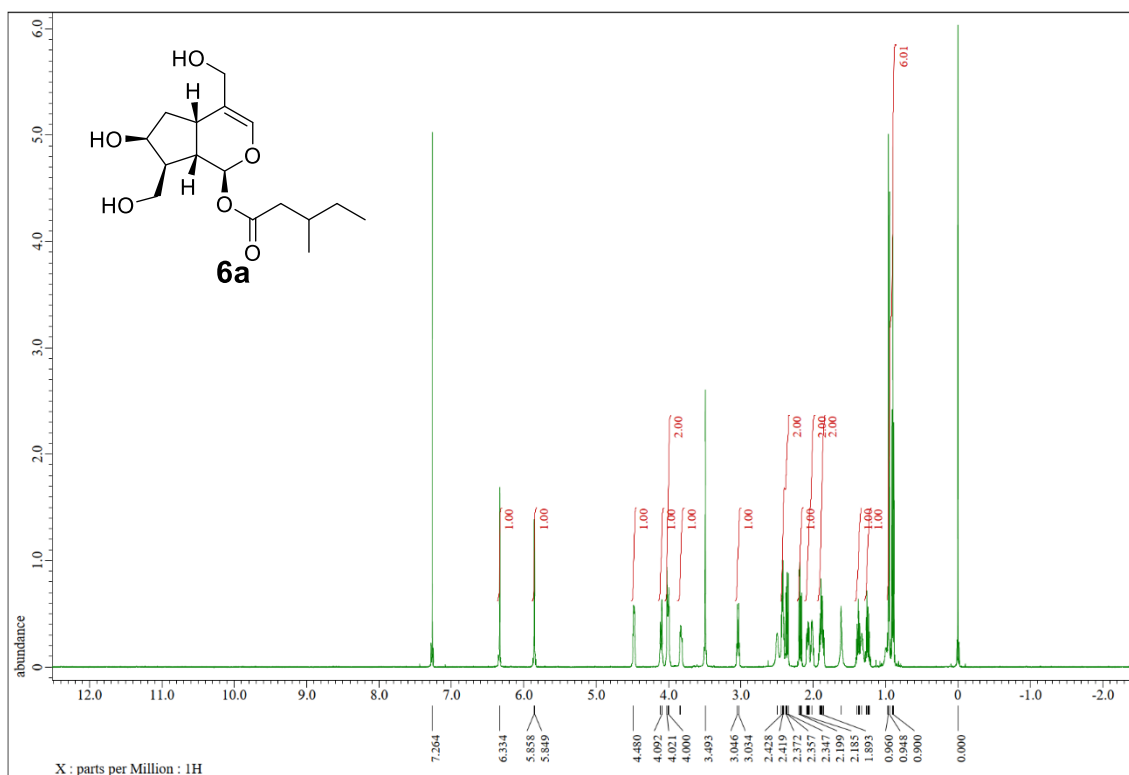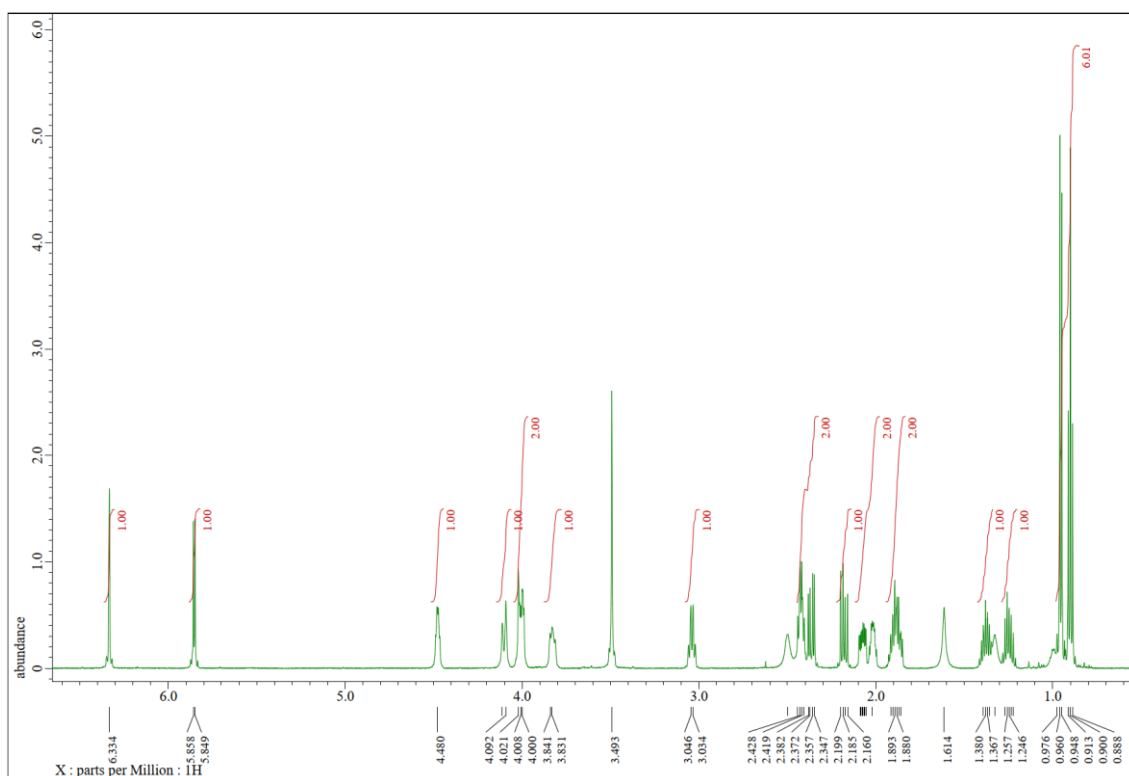

<sup>1</sup>H NMR spectrum of **6a**



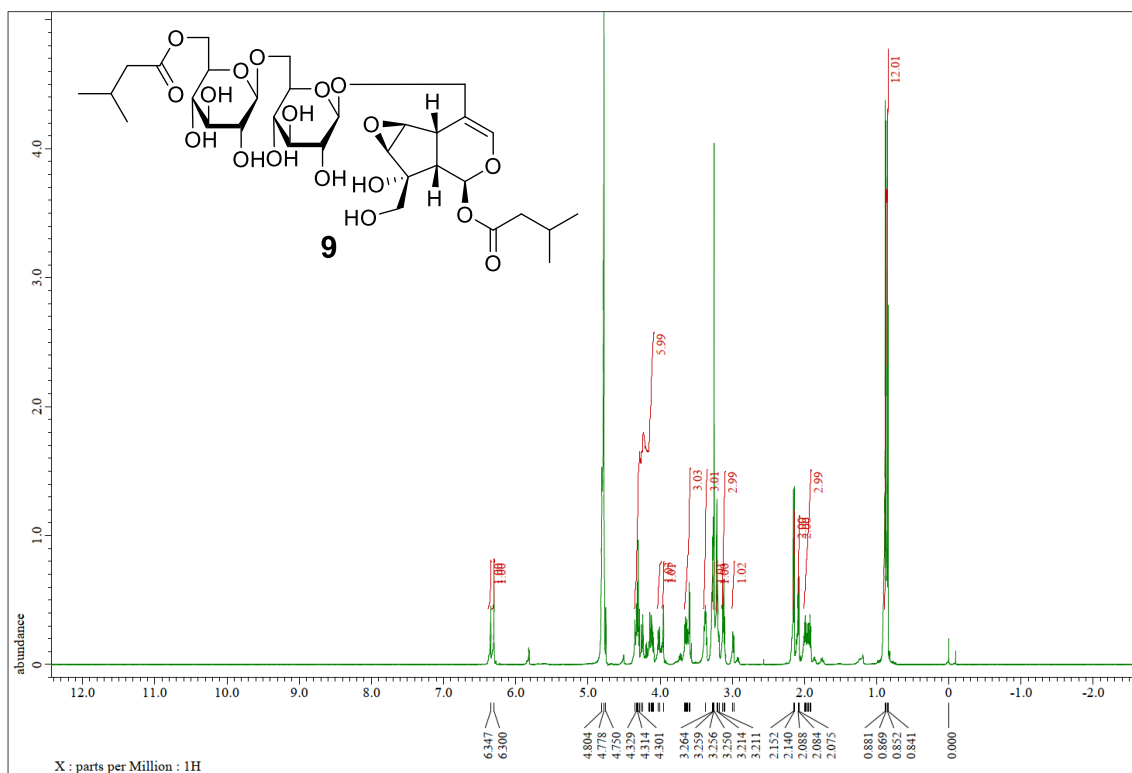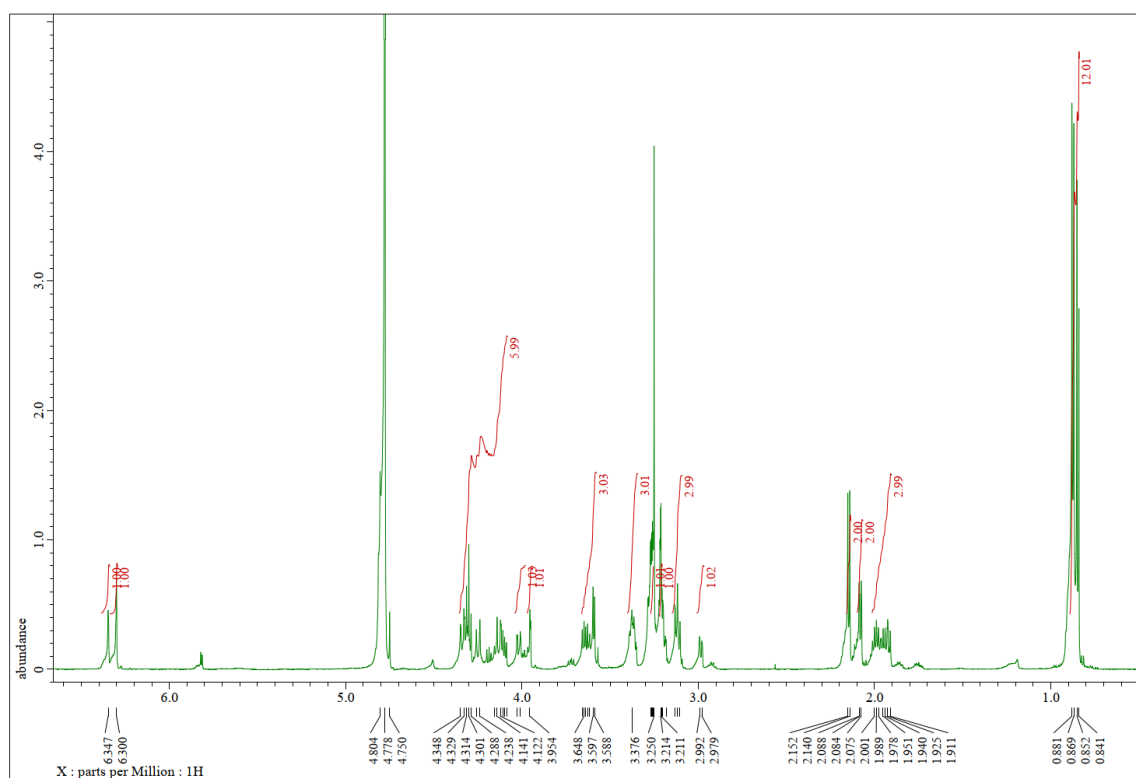

$^1\text{H}$  NMR spectrum of **9**



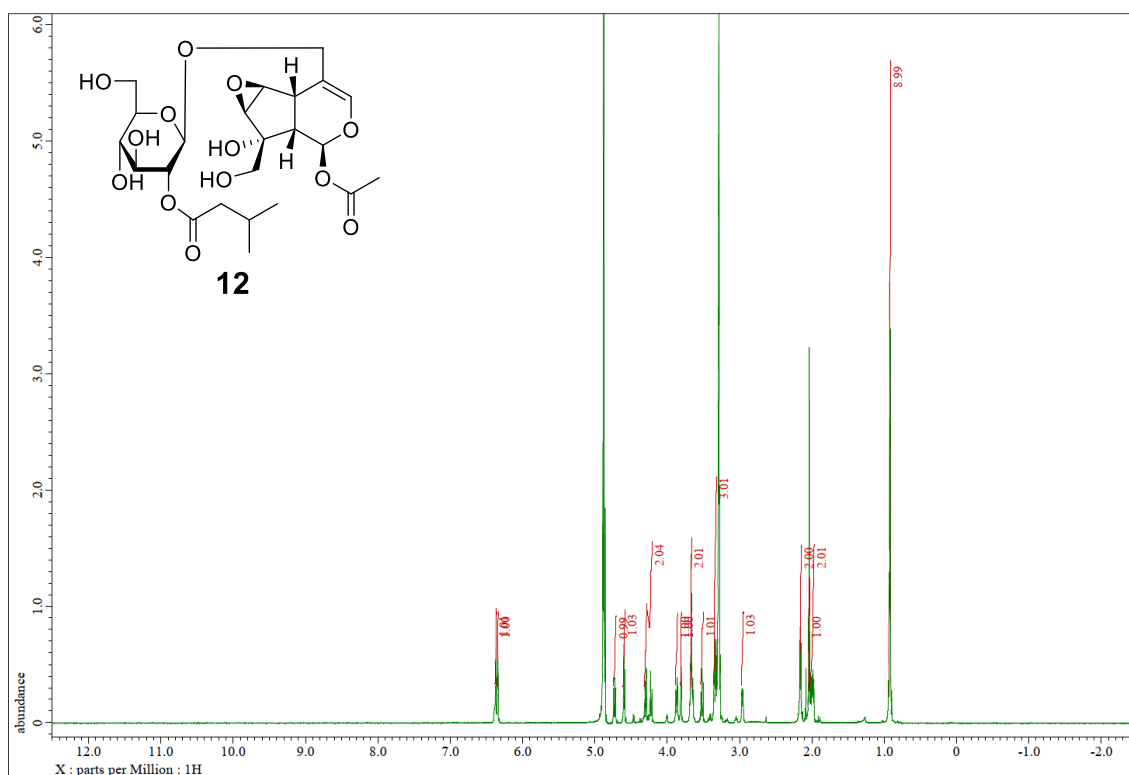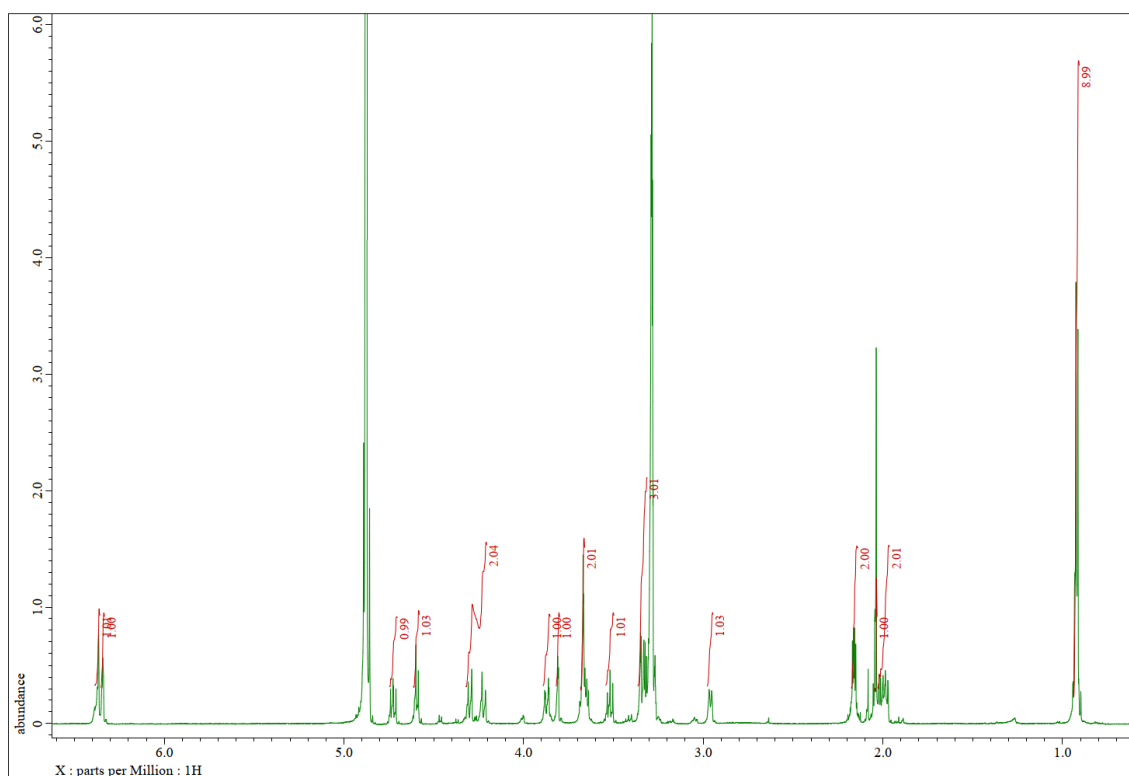

$^1\text{H}$  NMR spectrum of **12**

## S2. $^{13}\text{C}$ NMR spectra of new compounds 1–3, 6, 6a,7, 9, and 12

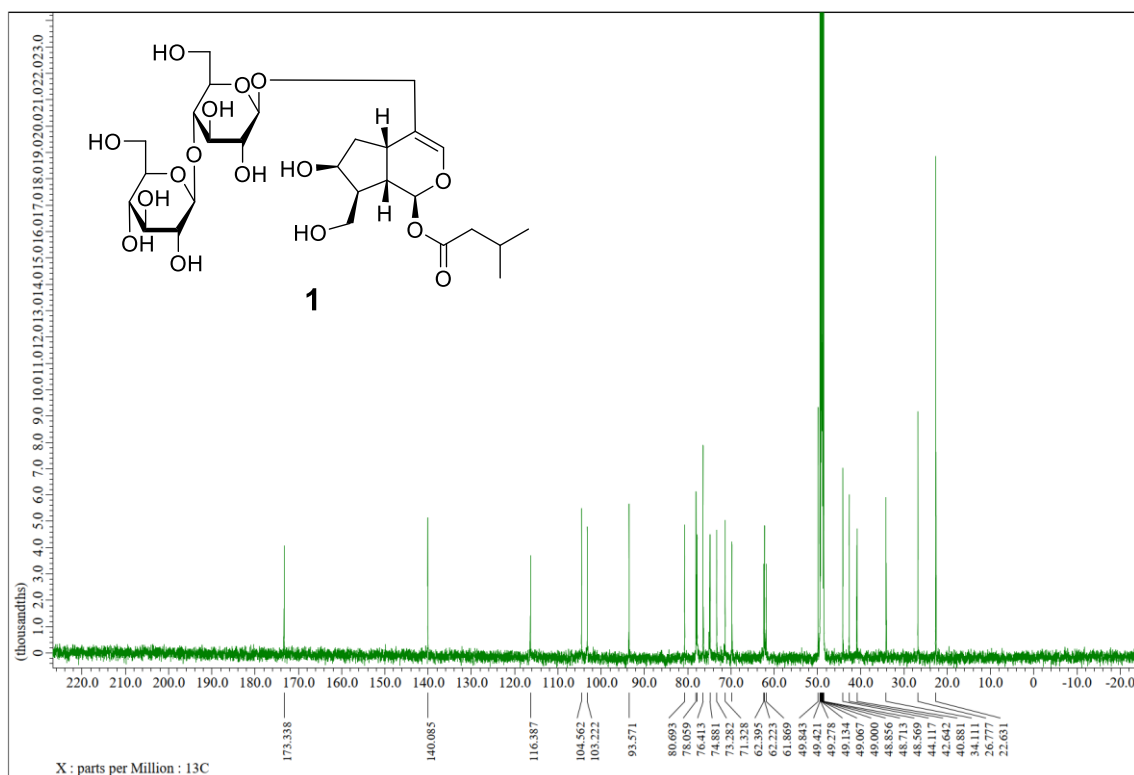

### $^{13}\text{C}$ NMR spectrum of 1

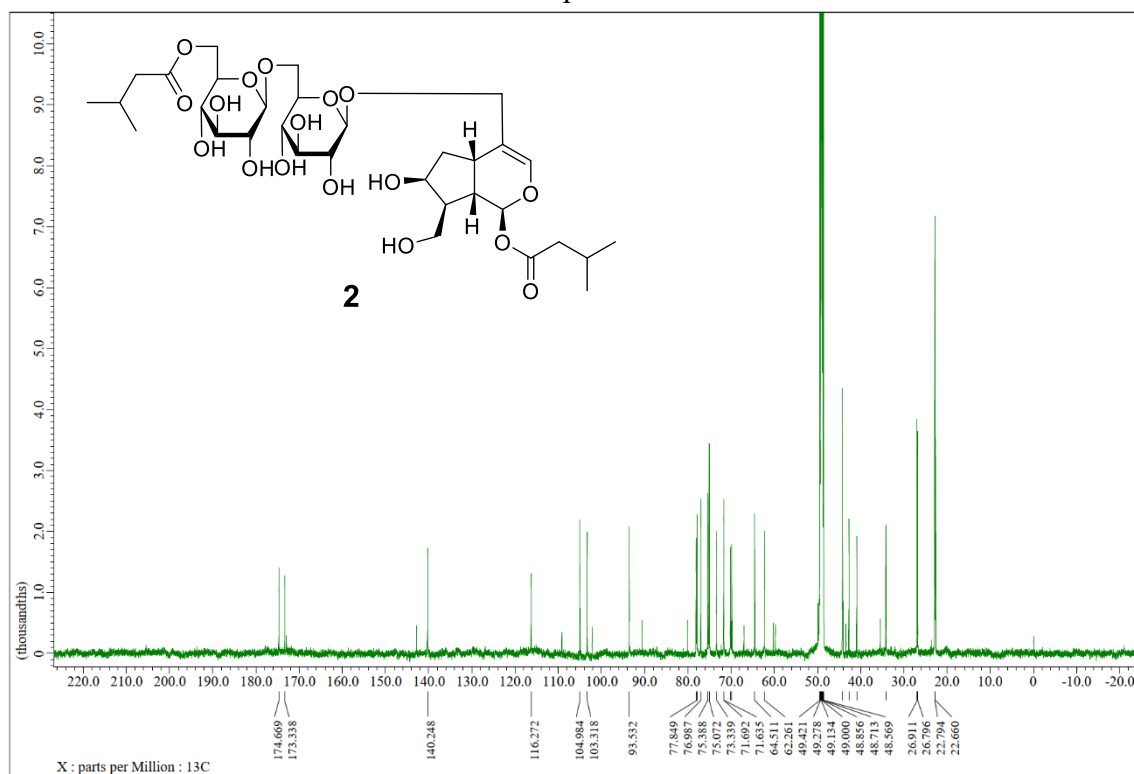

### $^{13}\text{C}$ NMR spectrum of 2

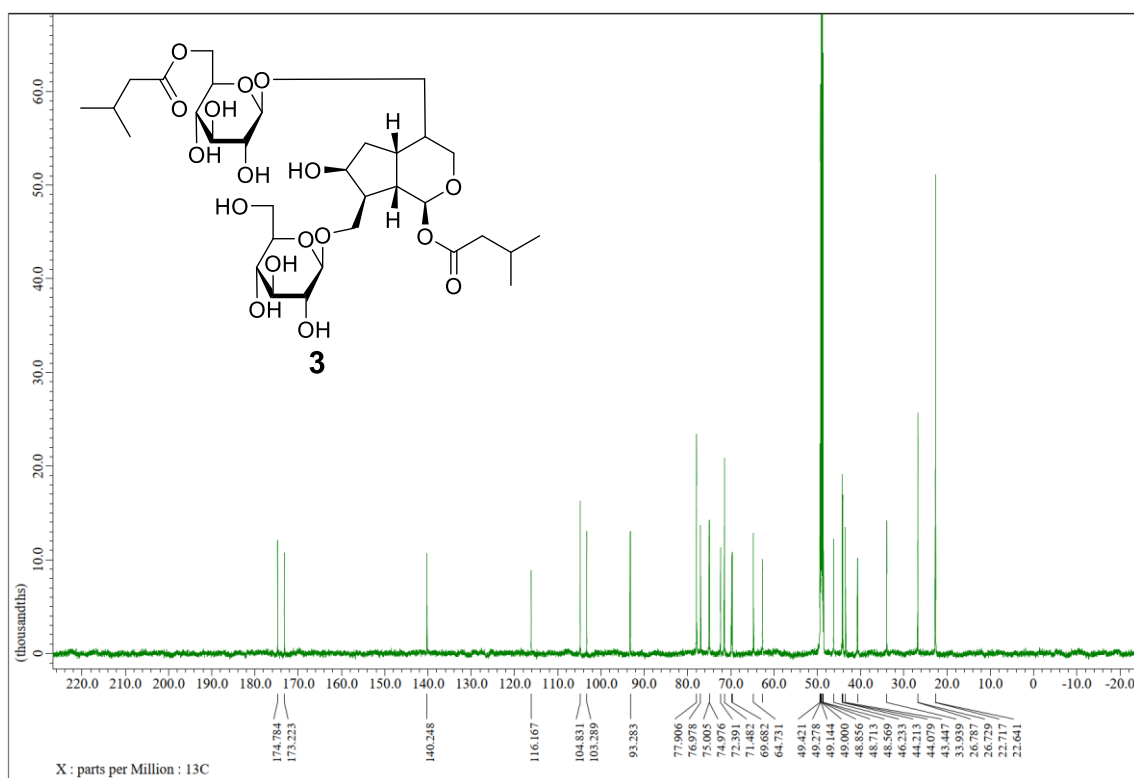

$^{13}\text{C}$  NMR spectrum of **3**

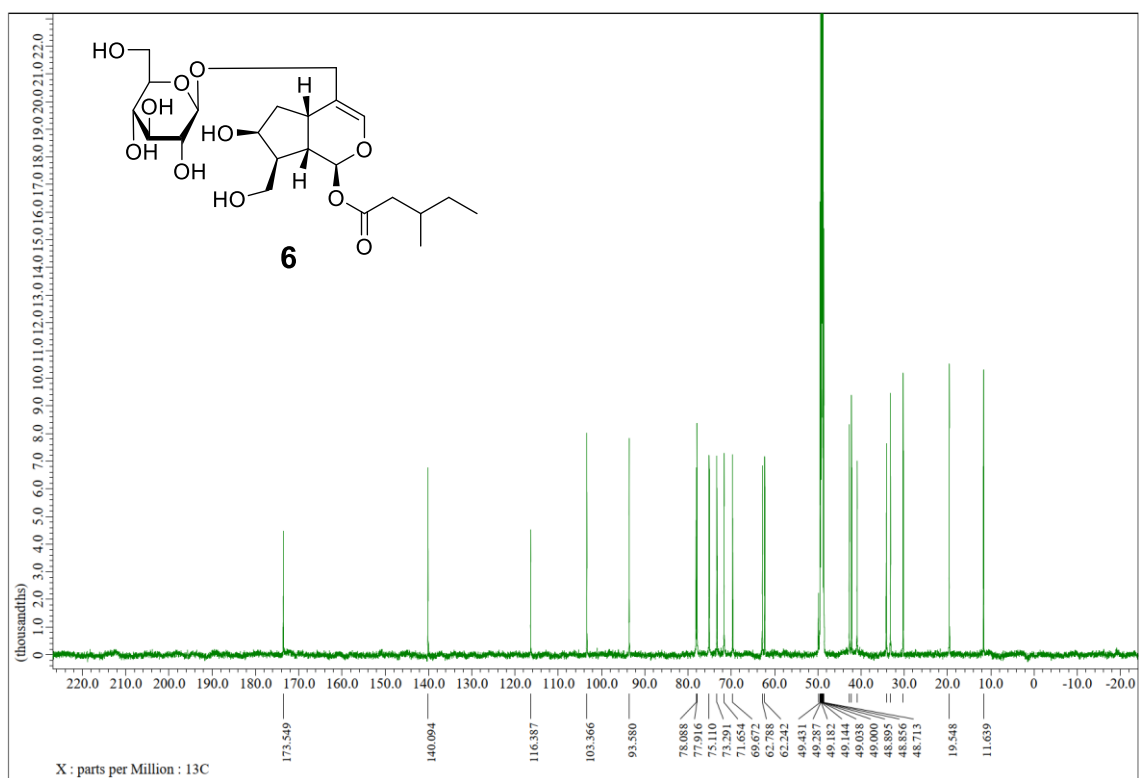

$^{13}\text{C}$  NMR spectrum of **6**

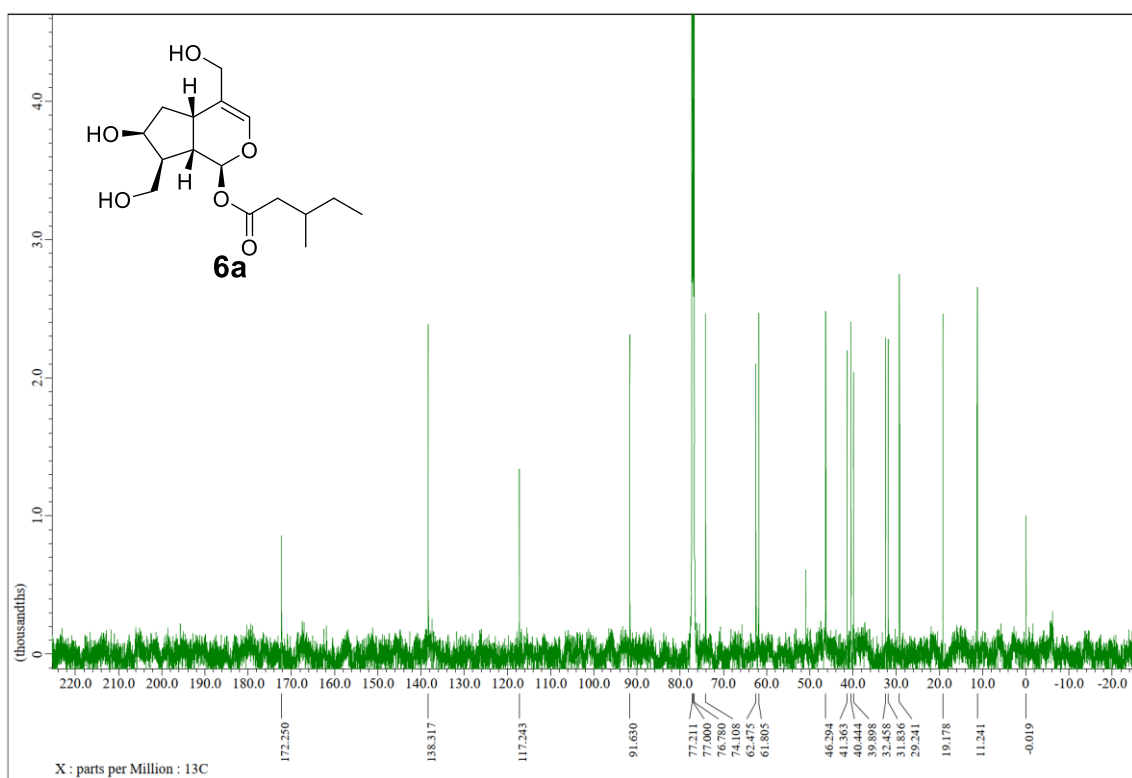

$^{13}\text{C}$  NMR spectrum of **6a**

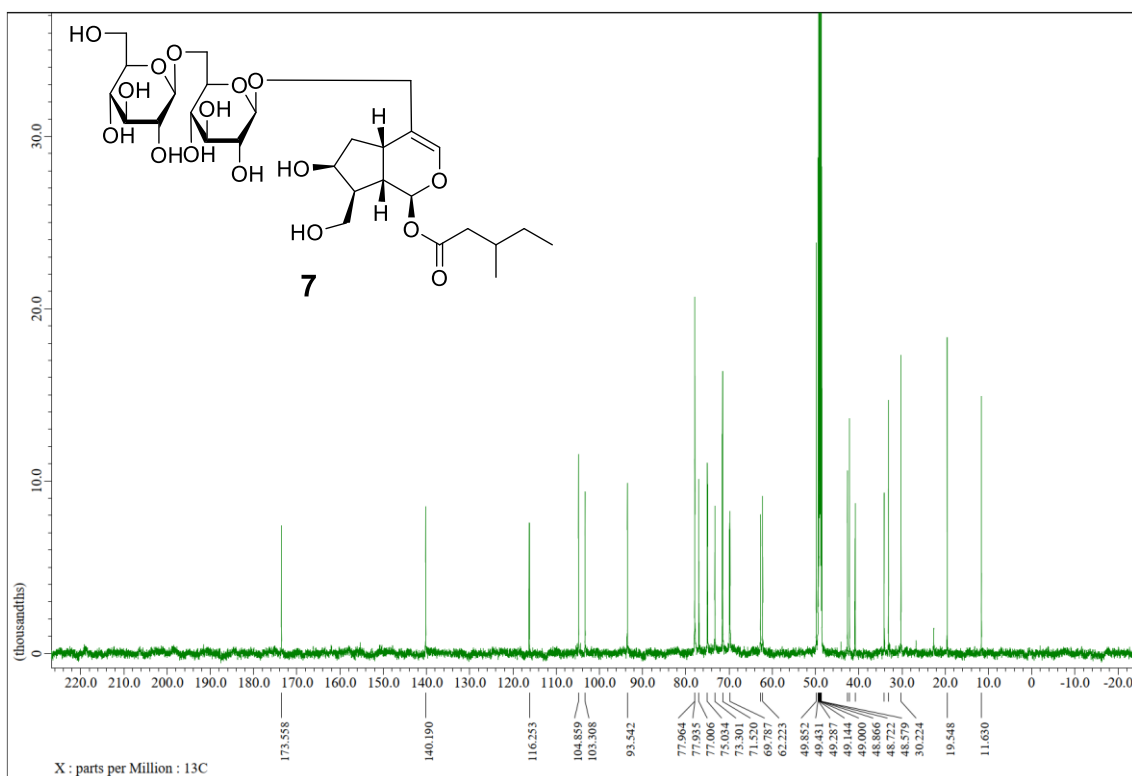

$^{13}\text{C}$  NMR spectrum of **7**

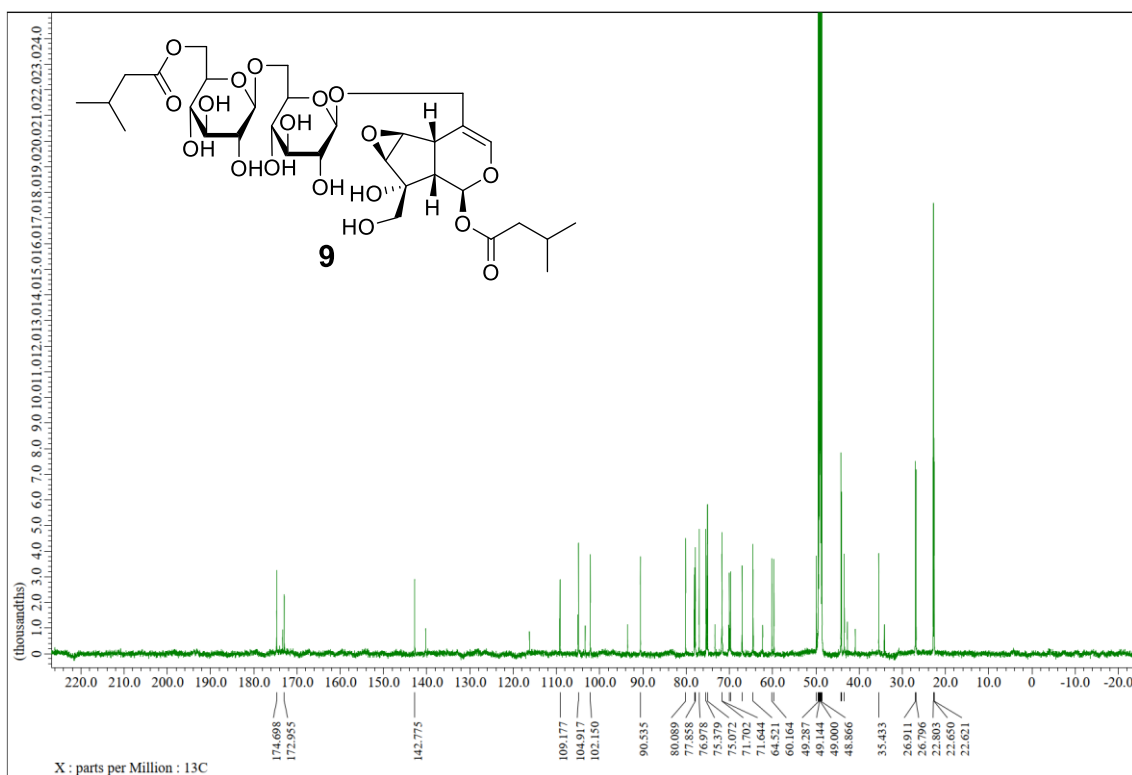

<sup>13</sup>C NMR spectrum of **9**

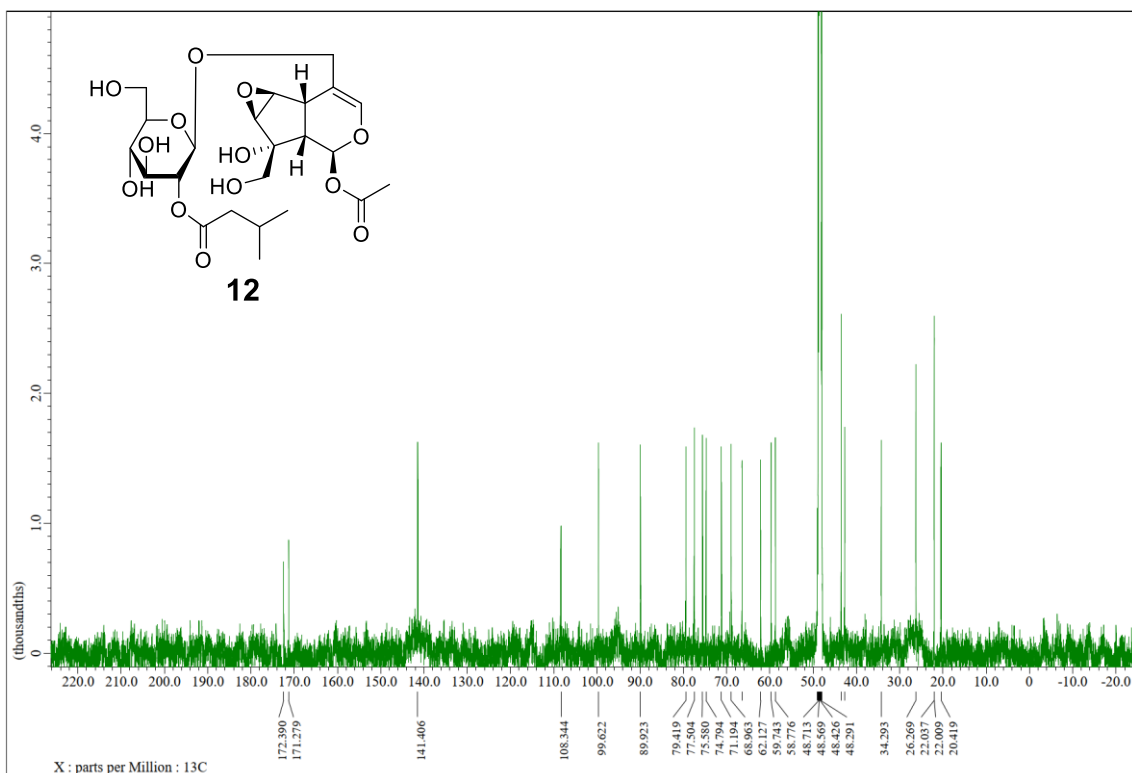

<sup>13</sup>C NMR spectrum of **12**

### S3. 2DNMR spectra of new compounds 1–3, 6, 6a, 7, 9, and 12

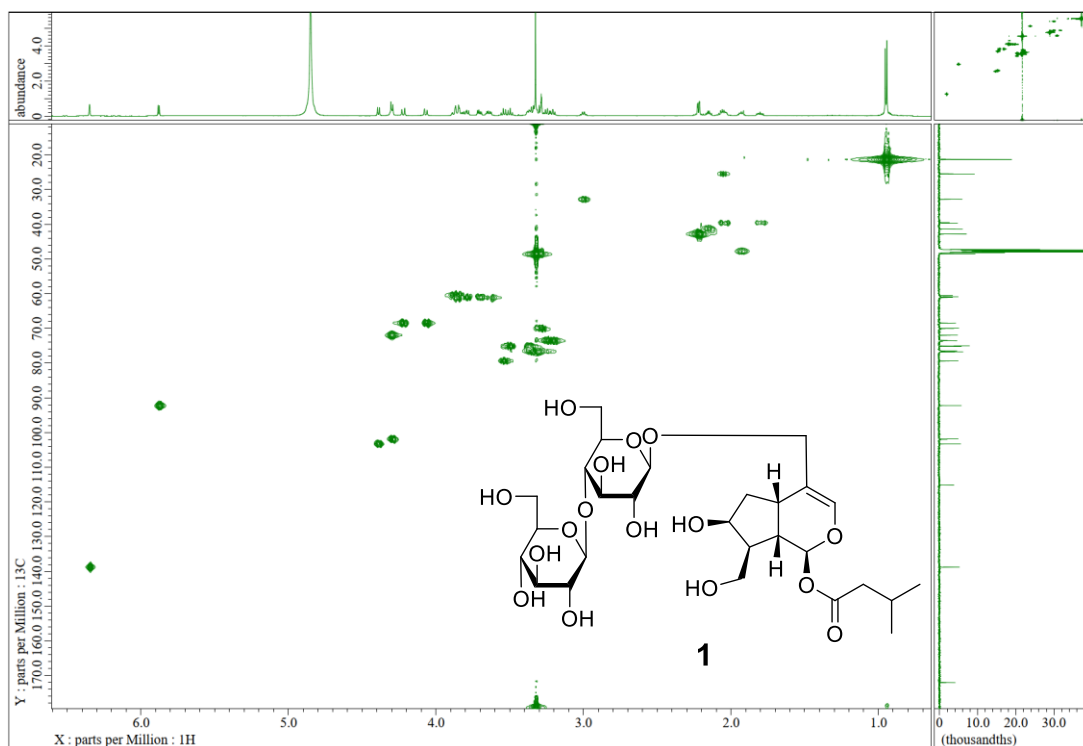

HMQC spectrum of **1**

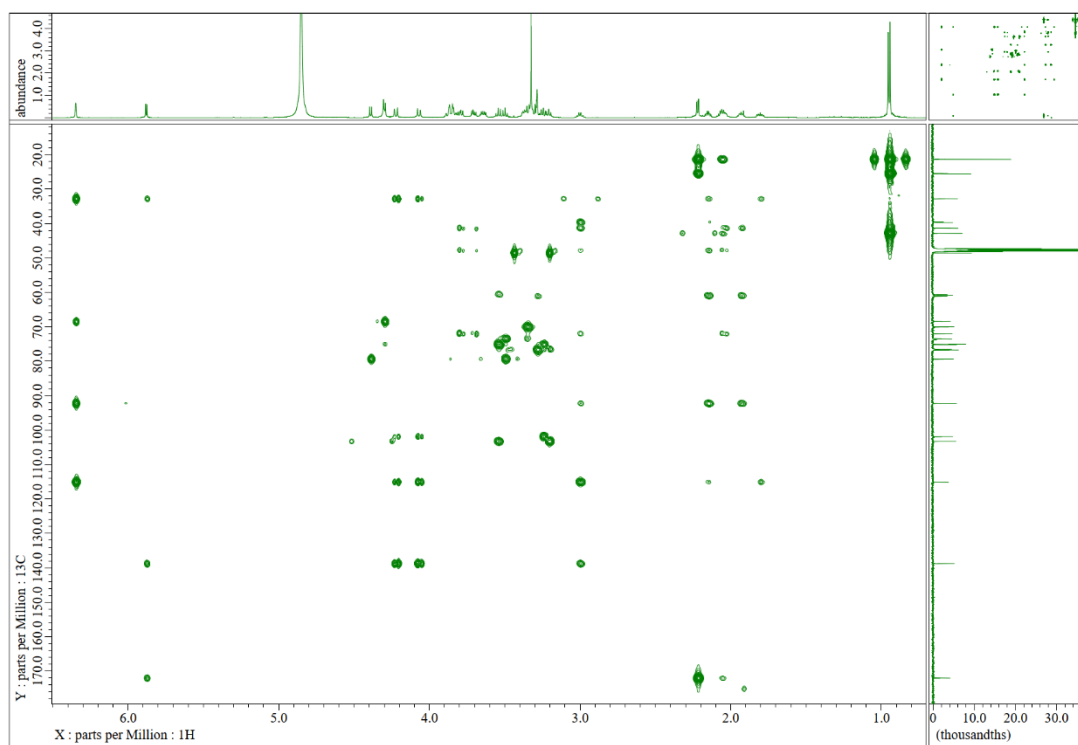

HMBC spectrum of **1**

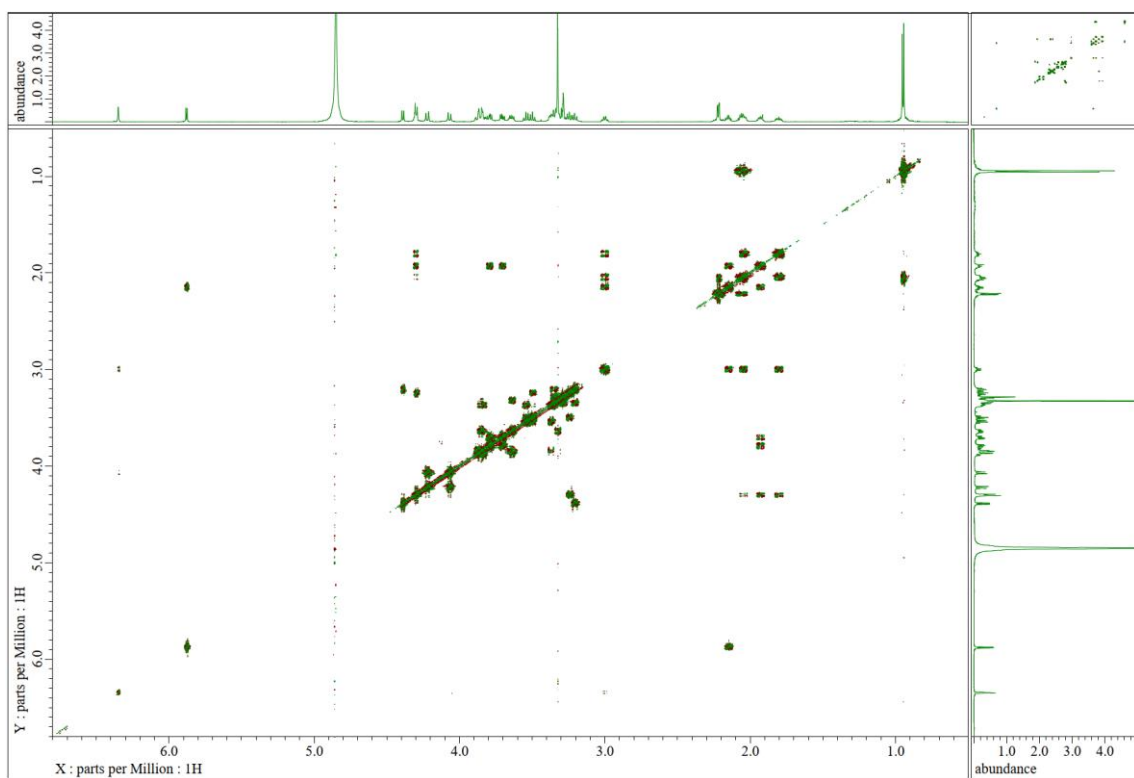

DQF spectrum of **1**

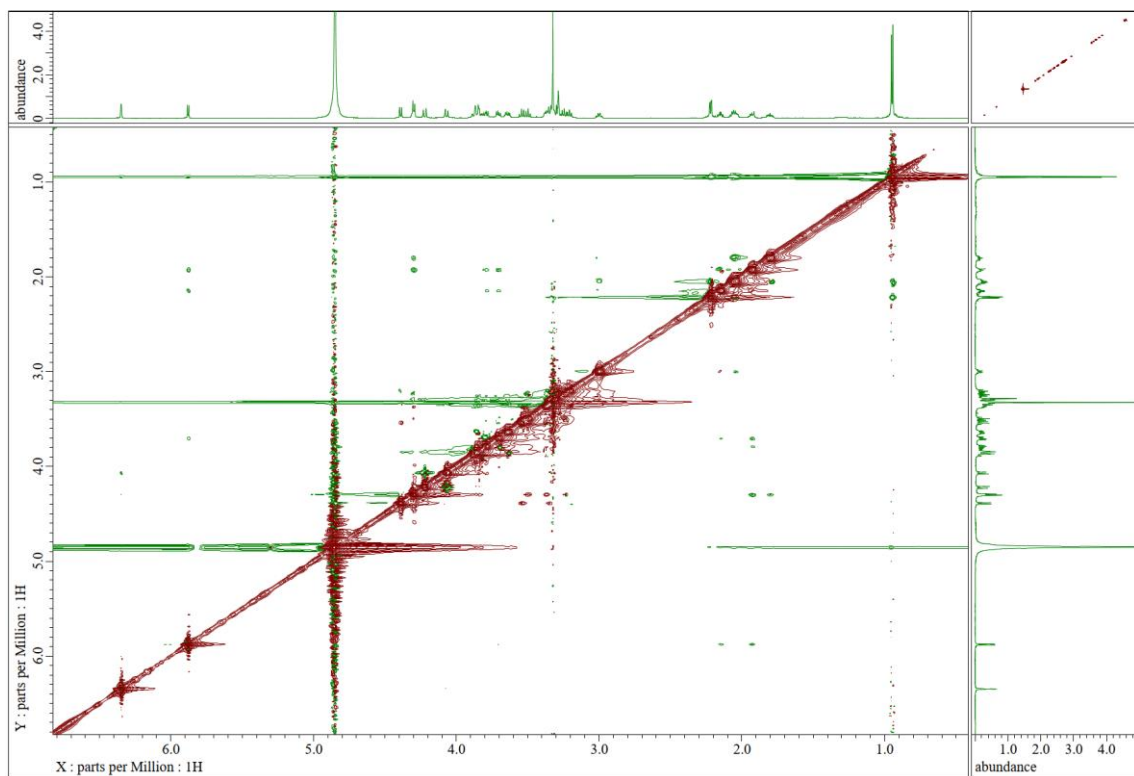

NOESY spectrum of **1**

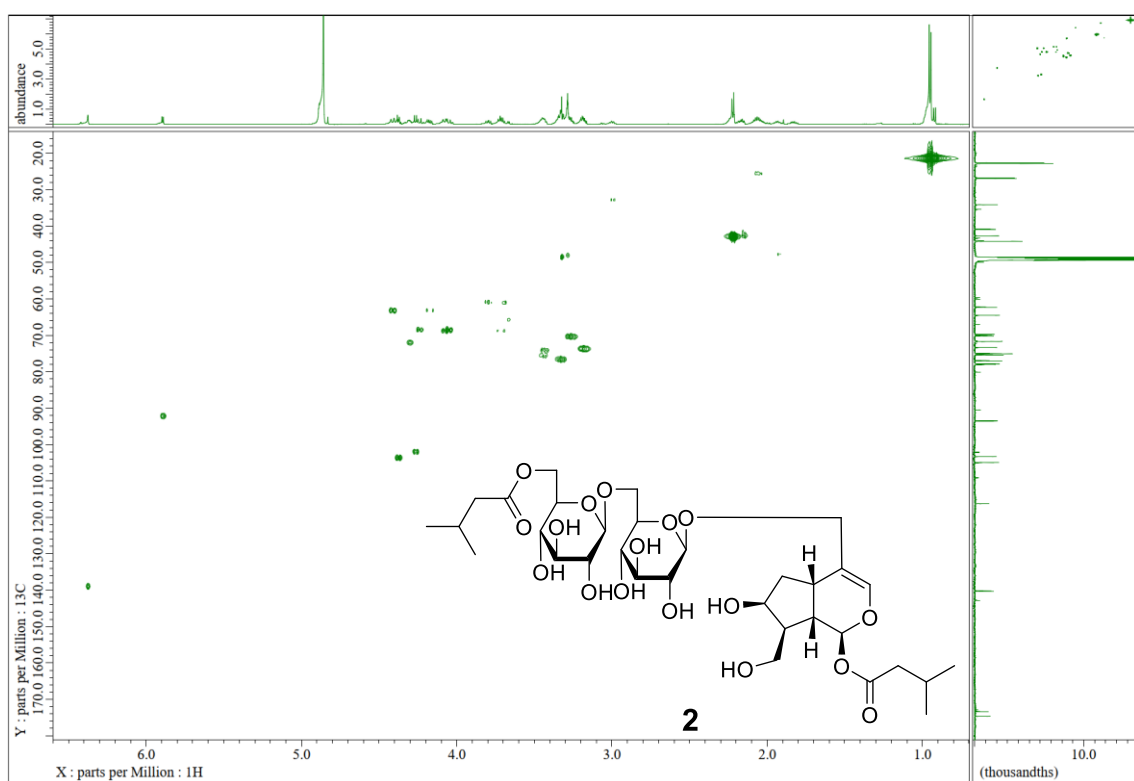

HMQC spectrum of **2**

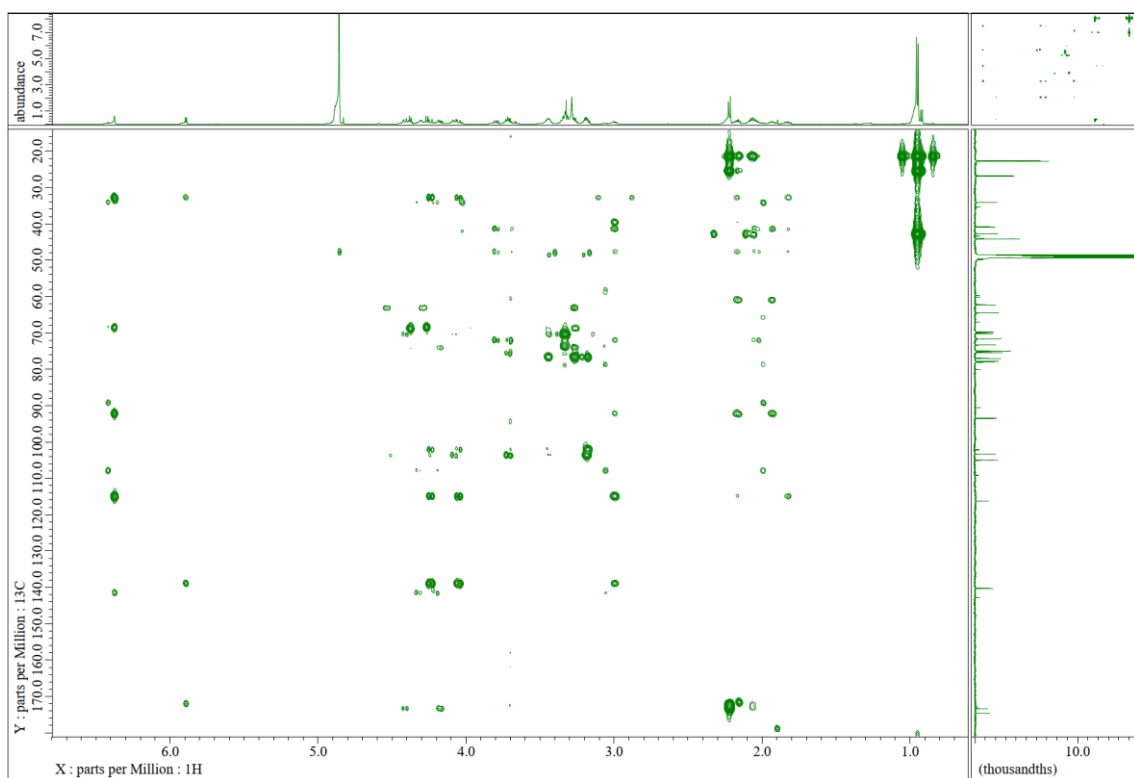

HMBC spectrum of **2**



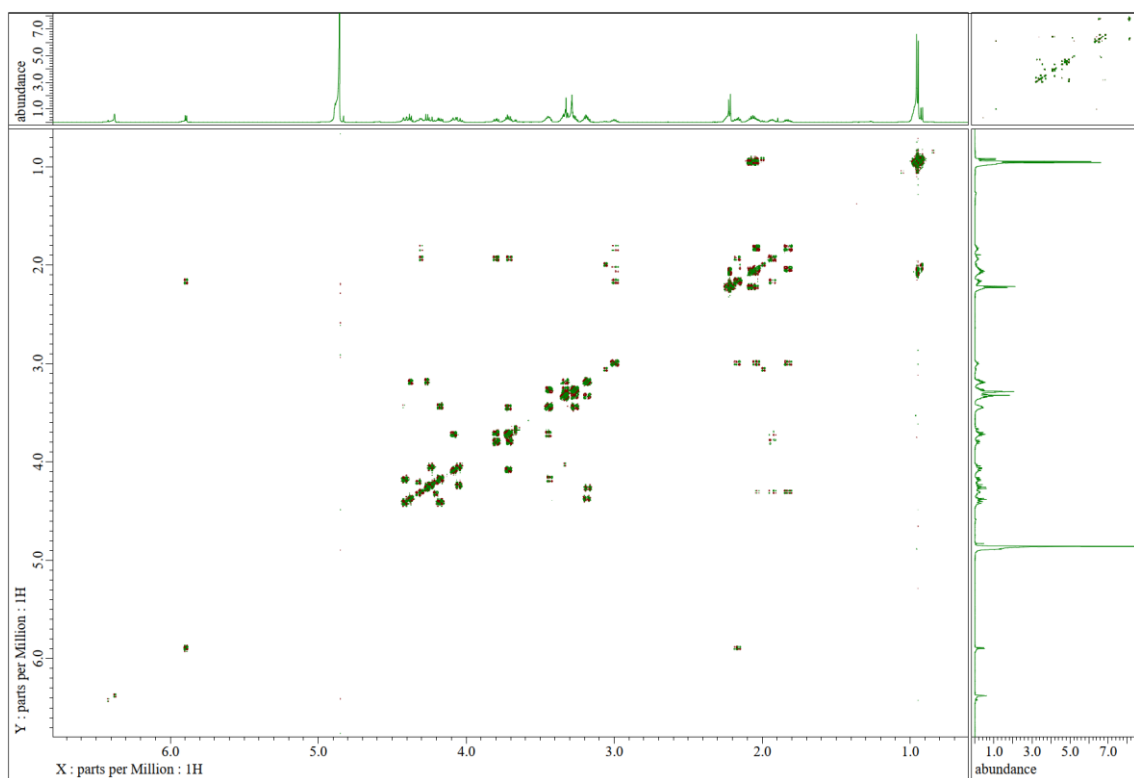

DQF spectrum of **2**

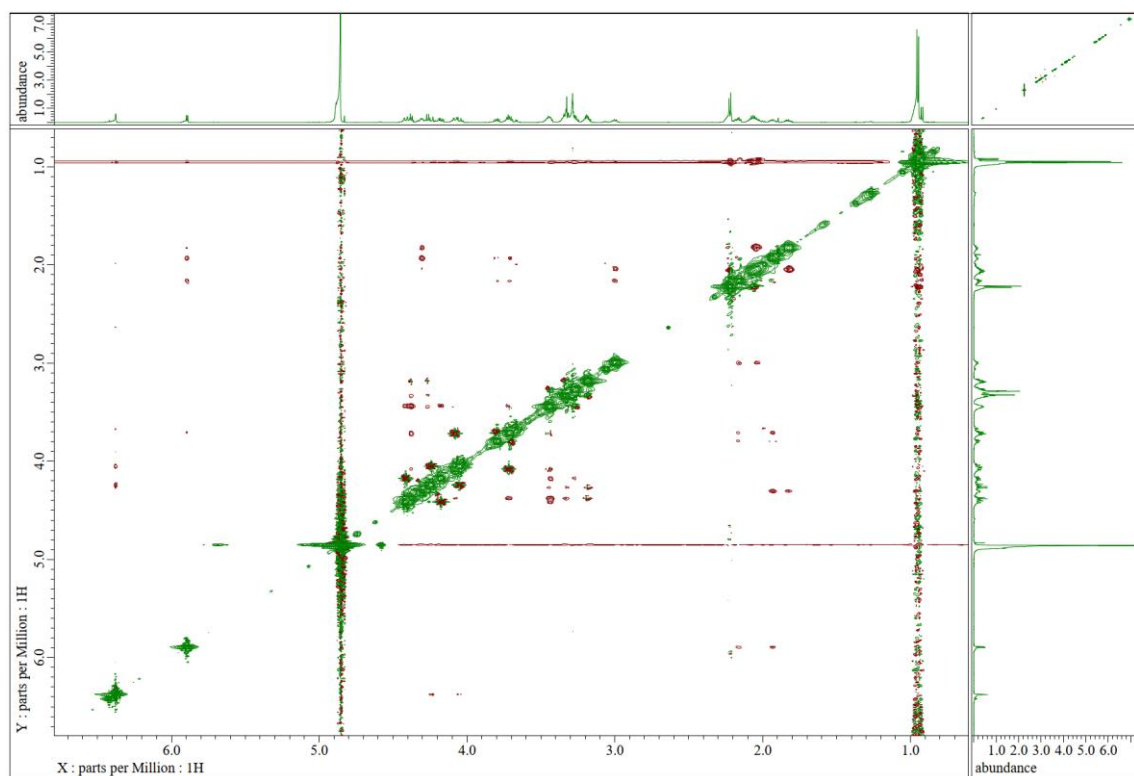

NOESY spectrum of **2**

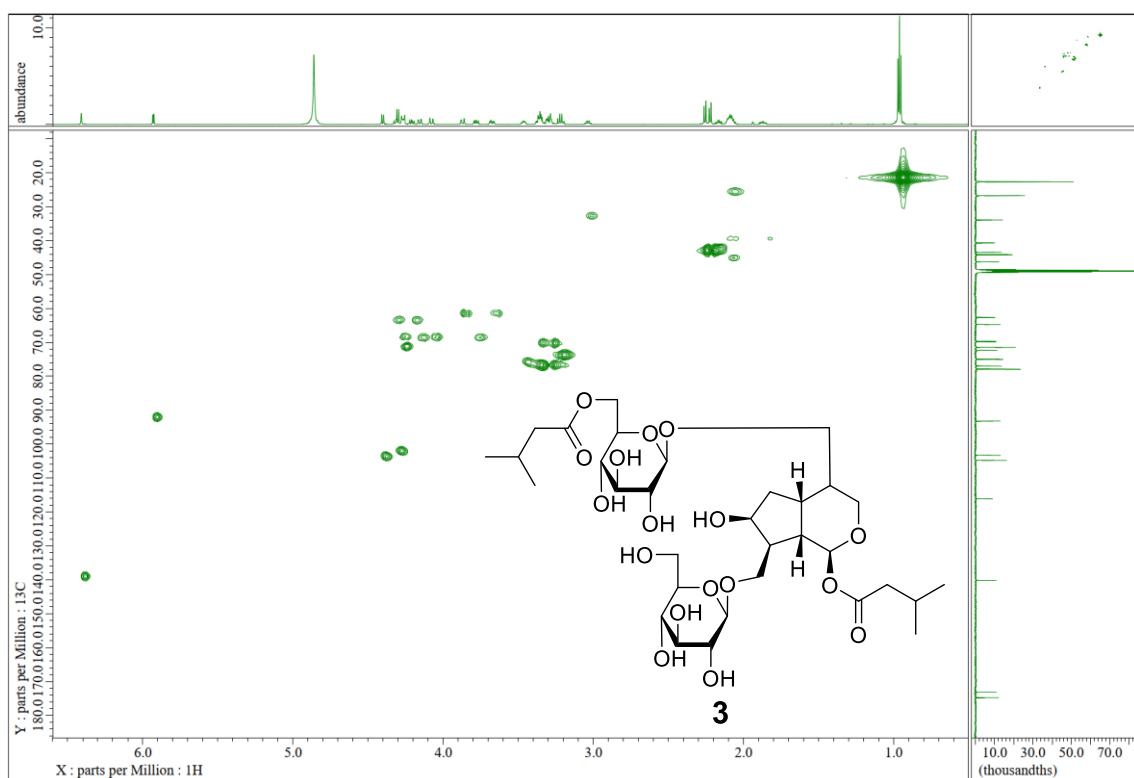

HMBC spectrum of **3**

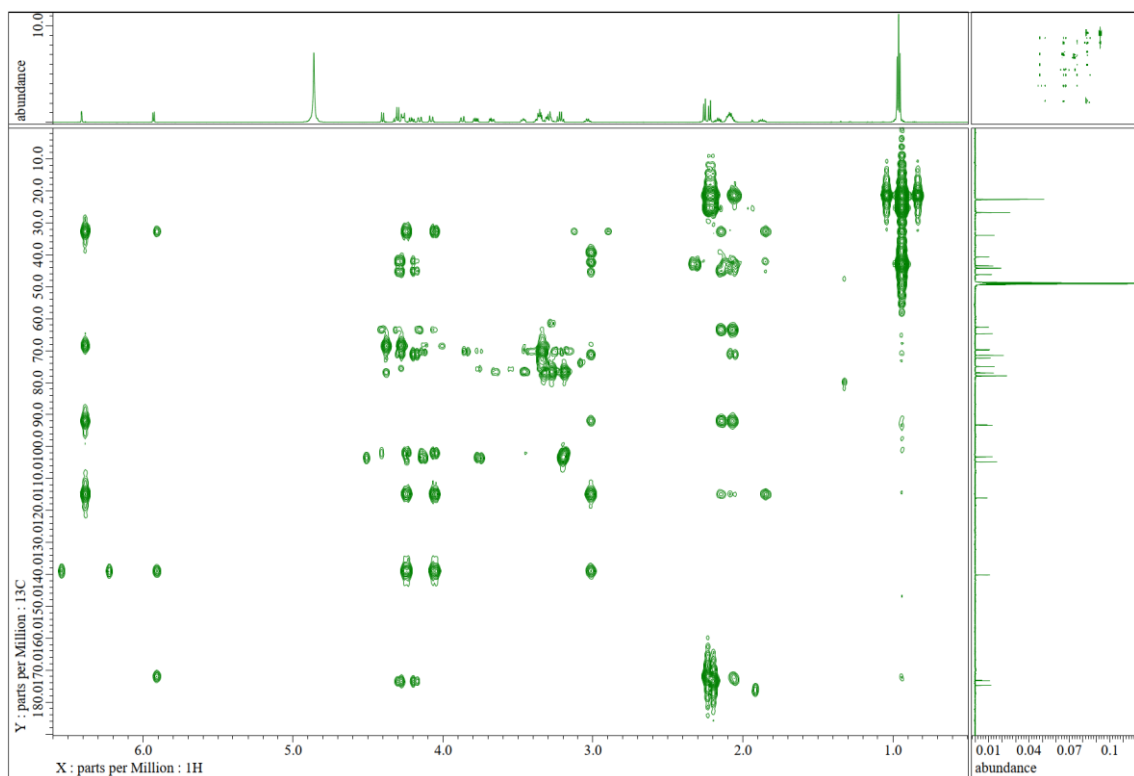

HMBC spectrum of **3**

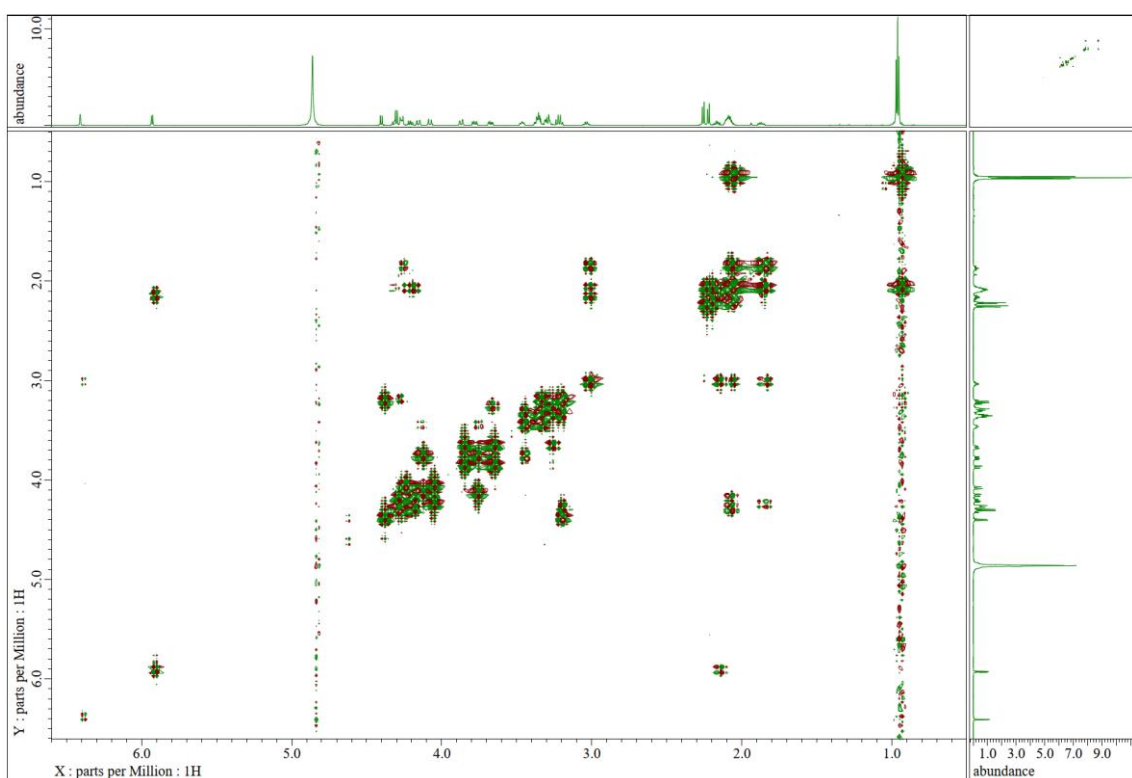

DQF spectrum of **3**

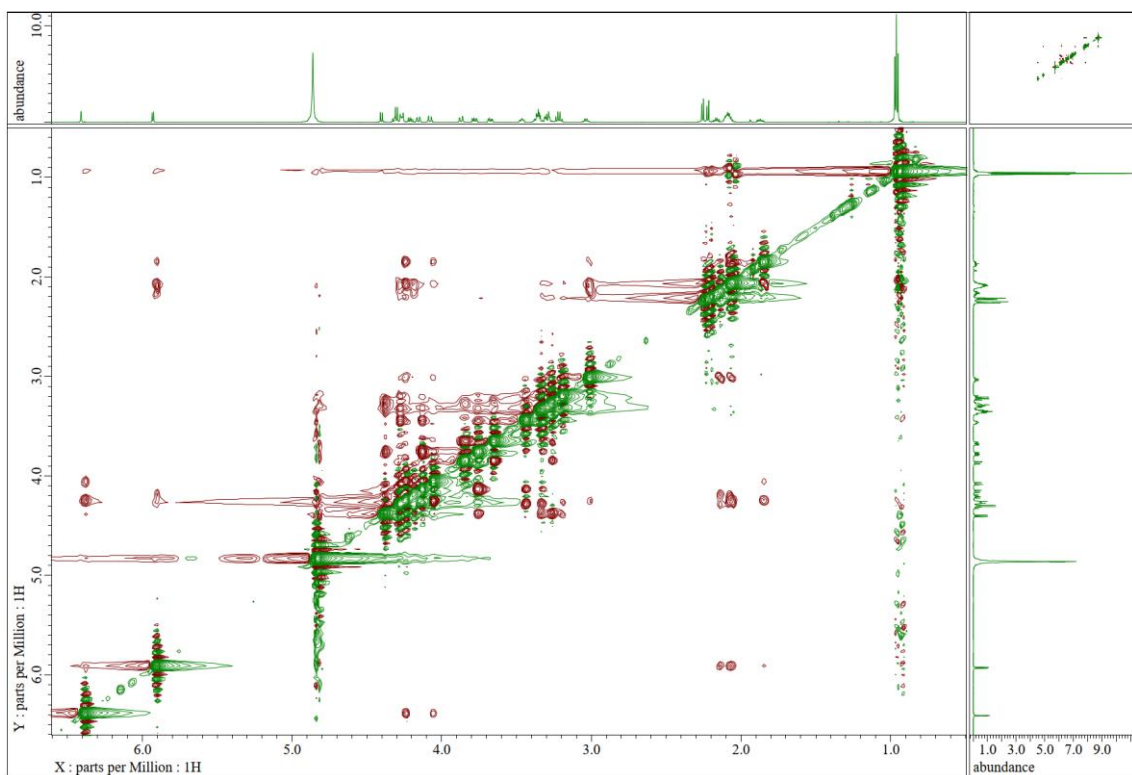

NOESY spectrum of **3**

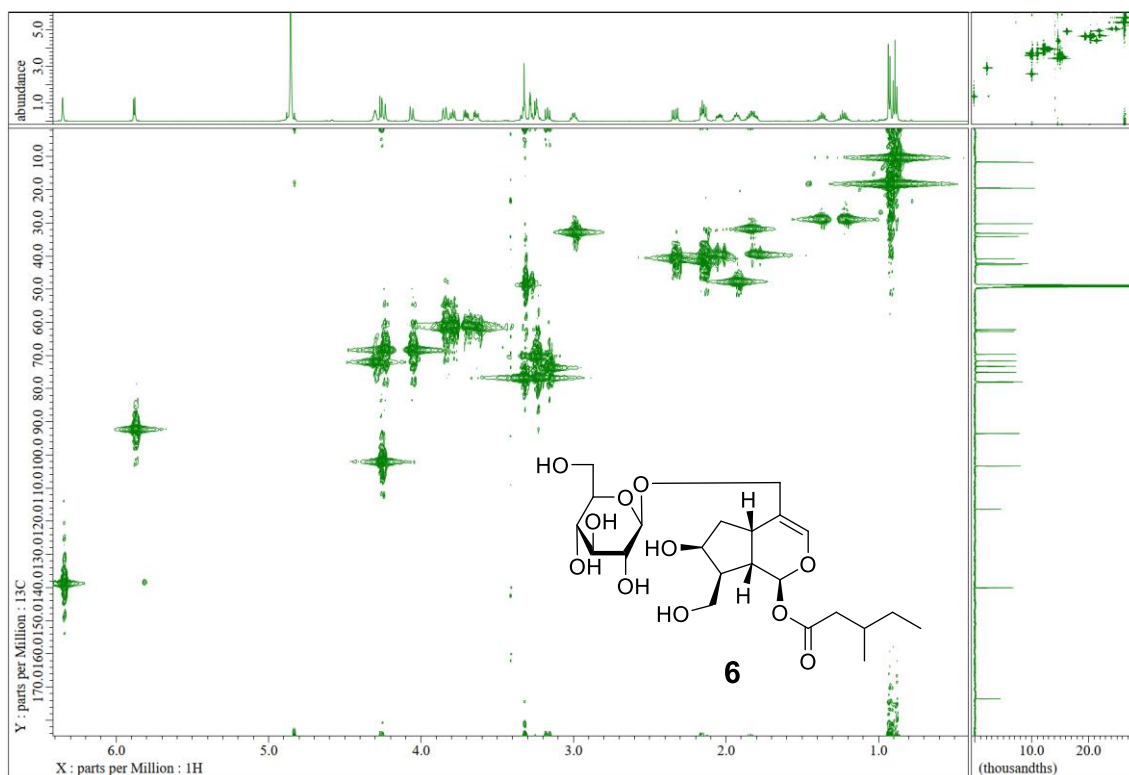

HMQC spectrum of **6**

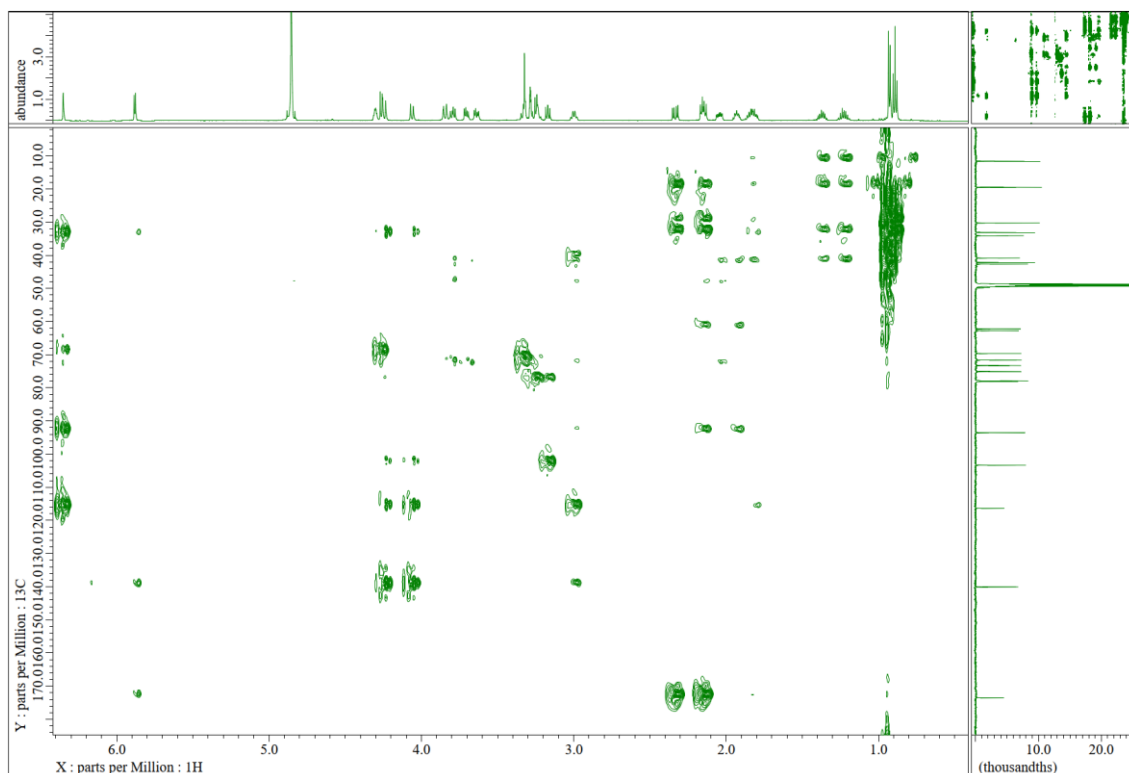

HMBC spectrum of **6**

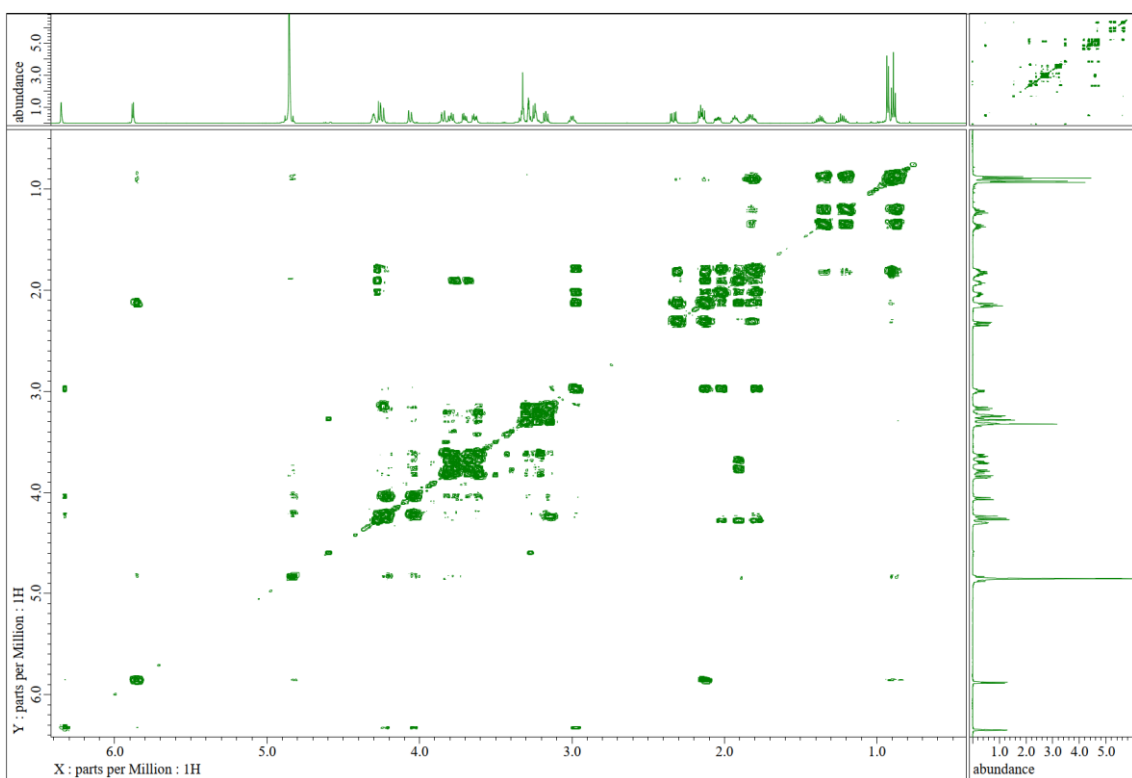

DQF spectrum of **6**

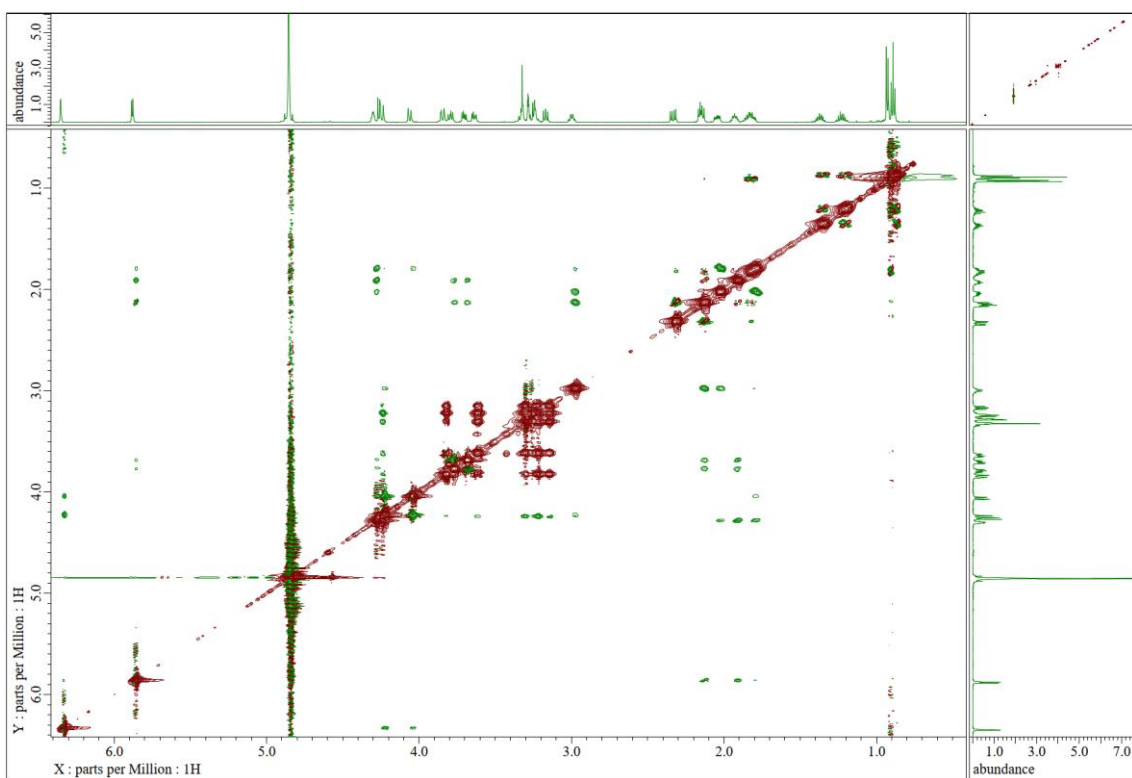

NOESY spectrum of **6**

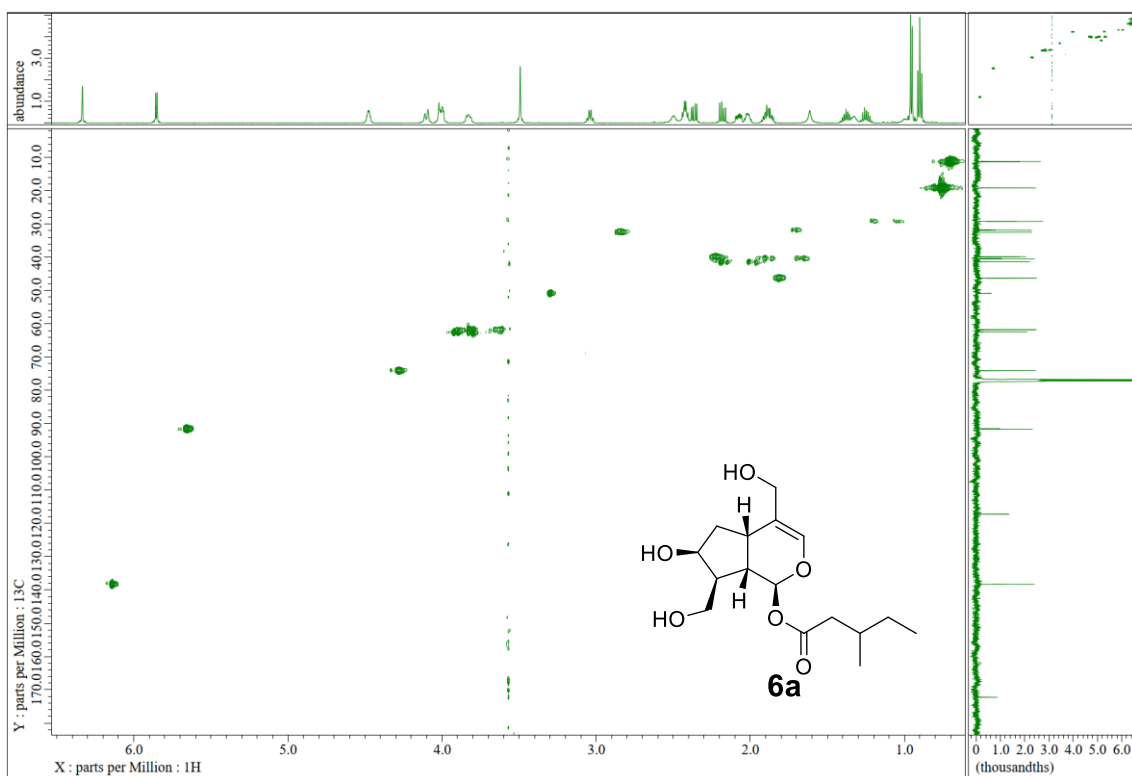

HMQC spectrum of **6a**

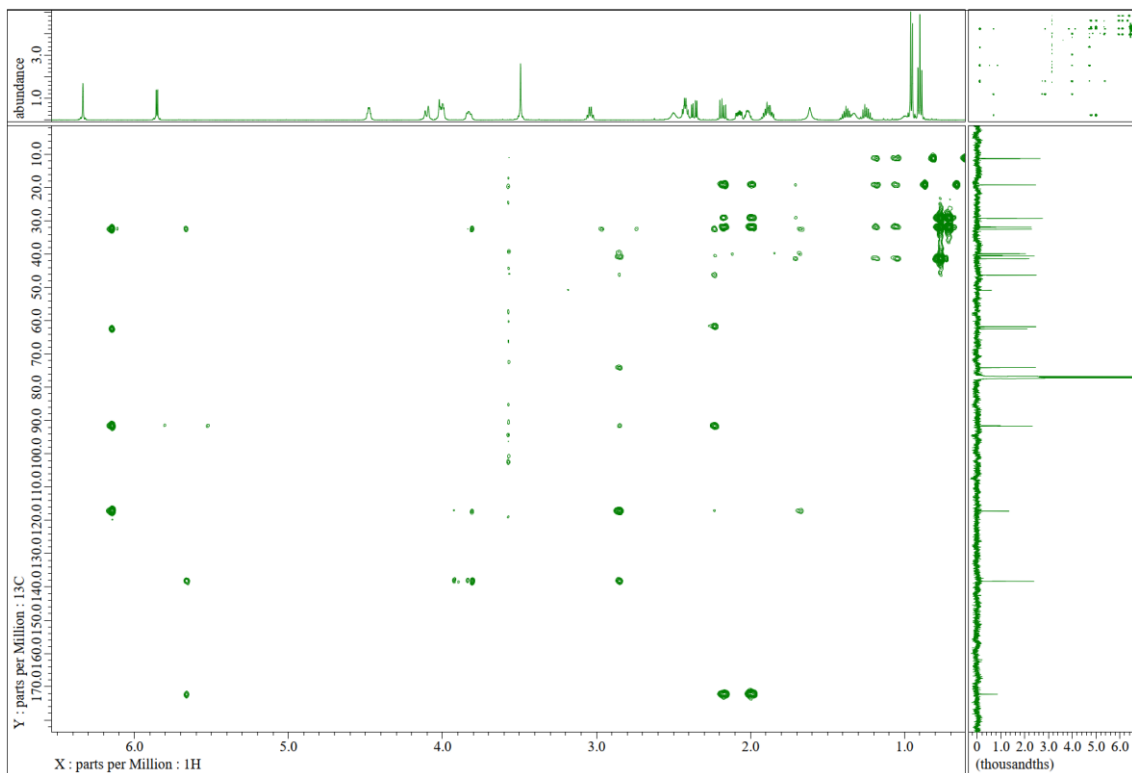

HMBC spectrum of **6a**

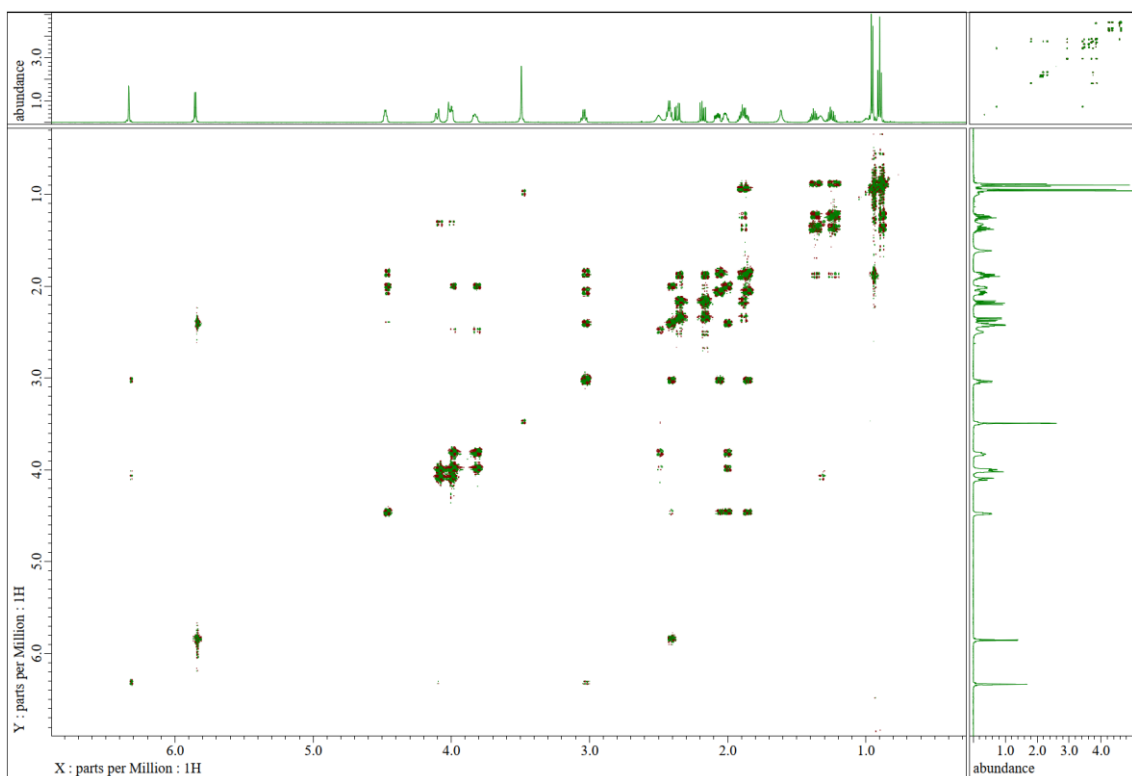

DQF spectrum of **6a**

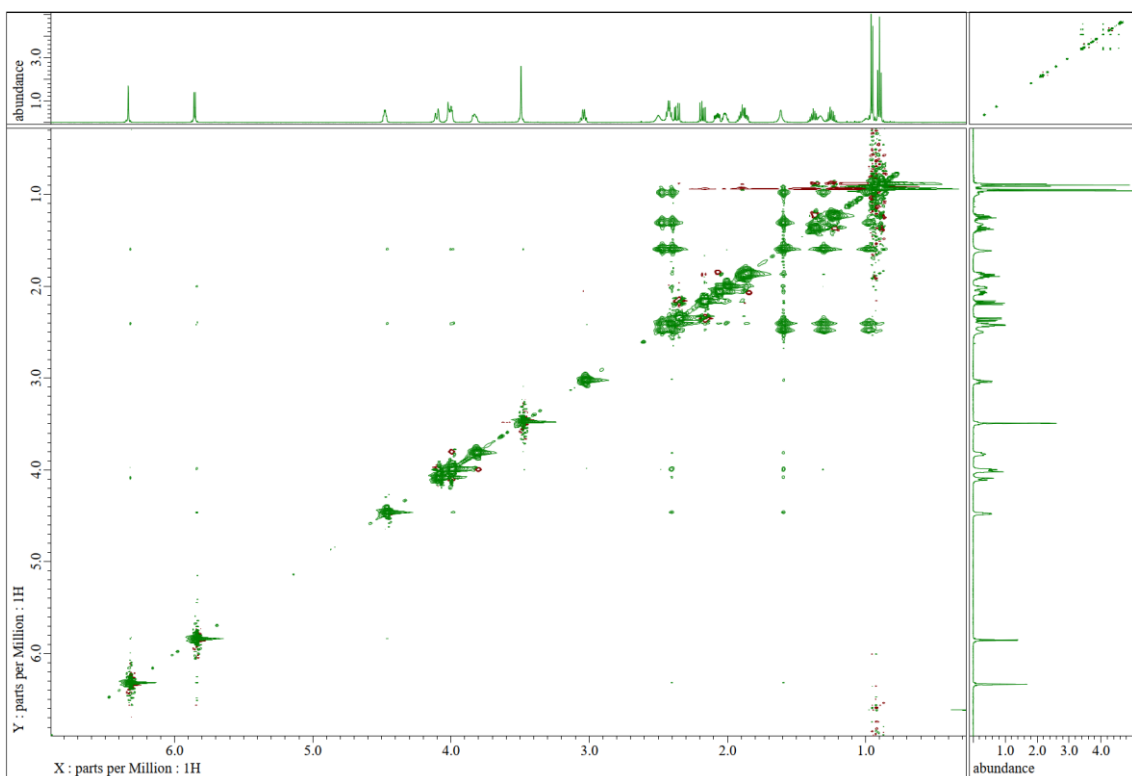

NOESY spectrum of **6a**

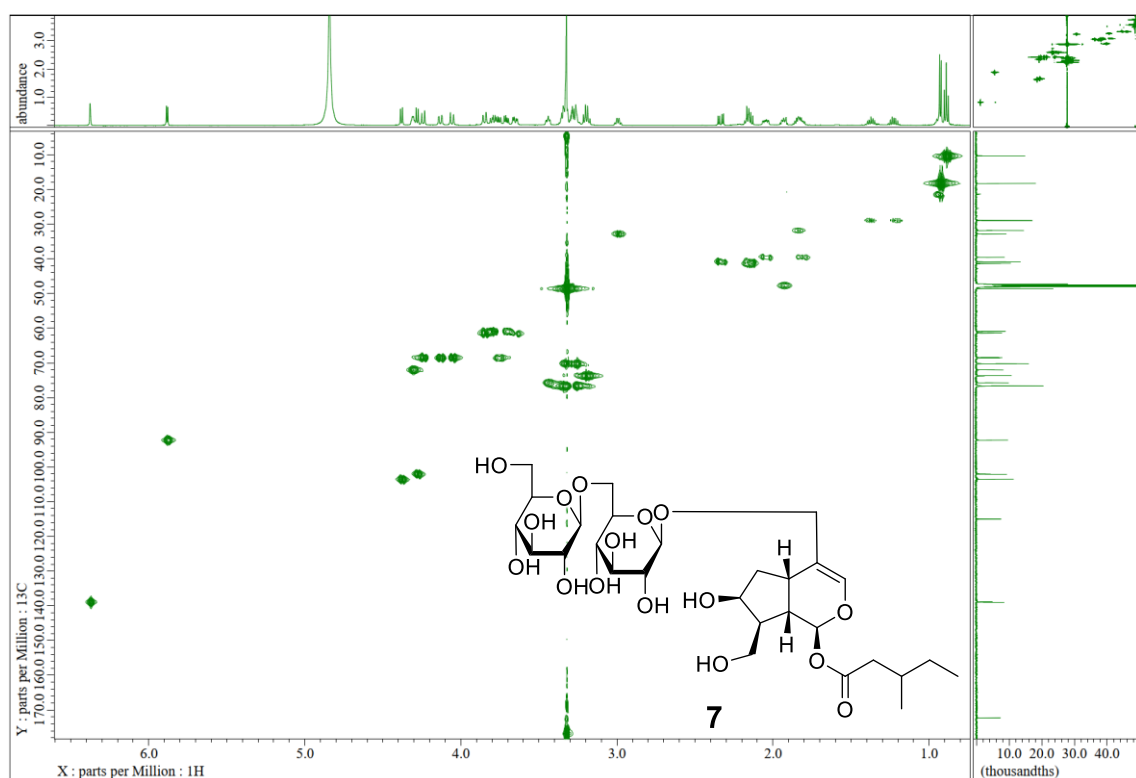

HMQC spectrum of 7

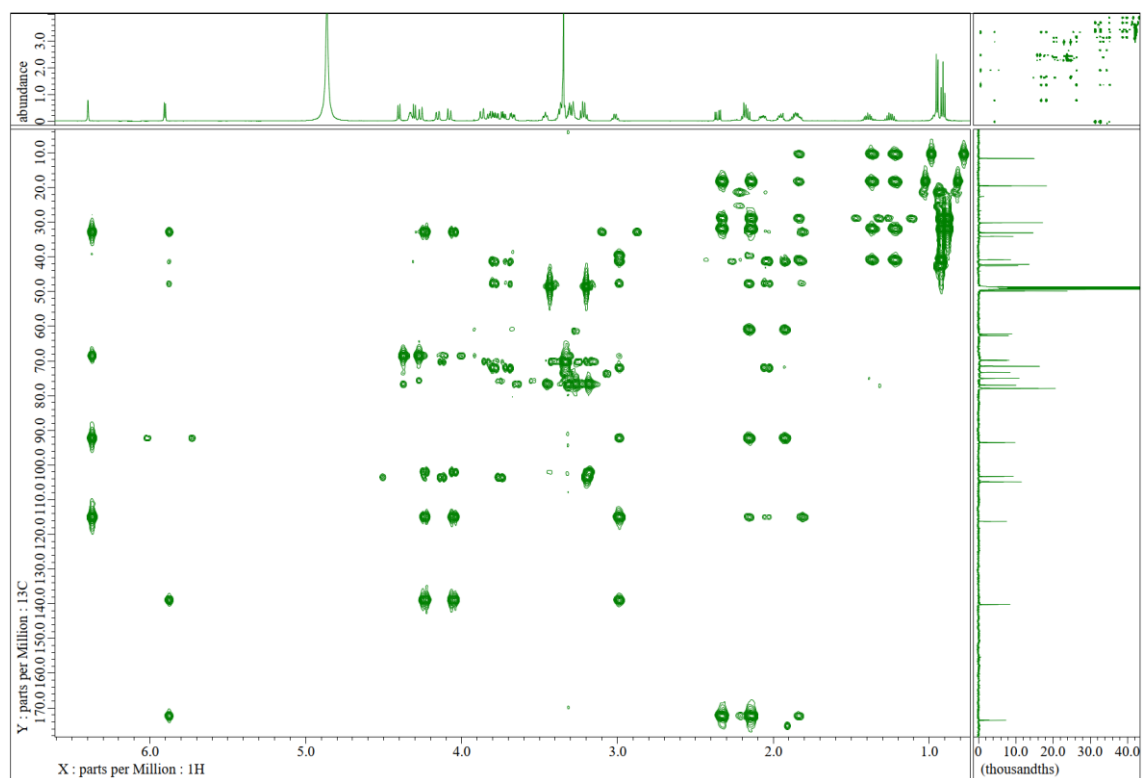

HMBC spectrum of 7



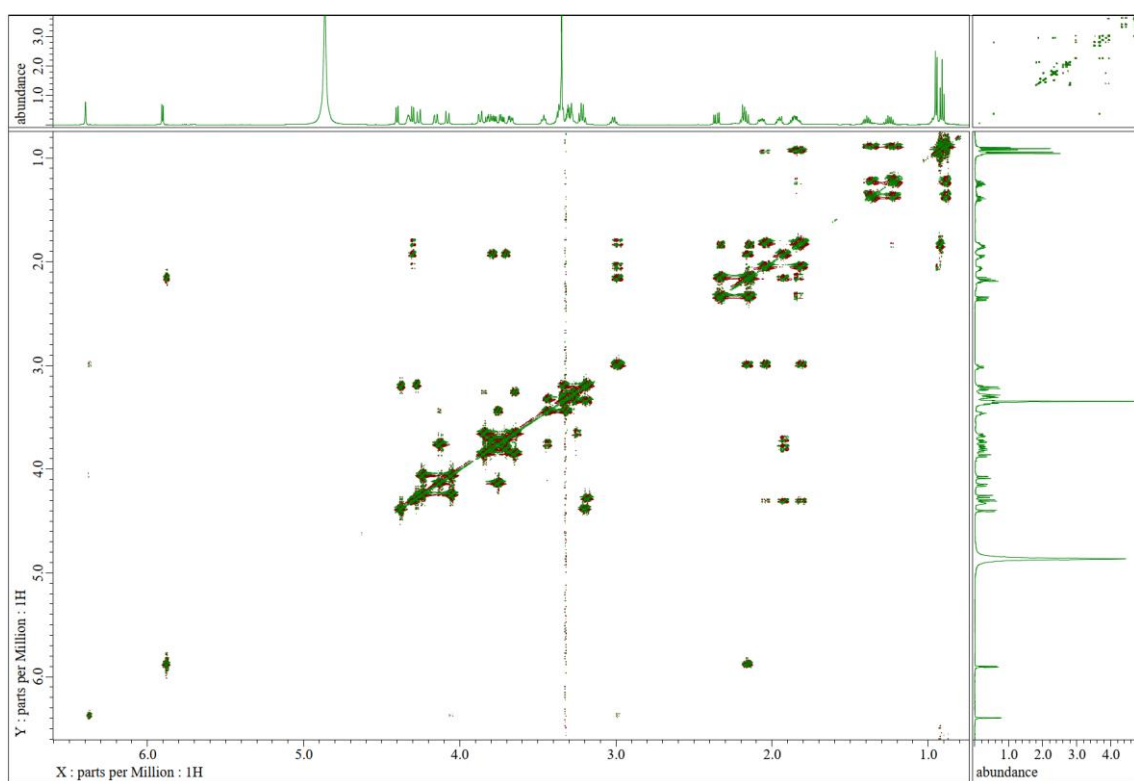

DQF spectrum of 7

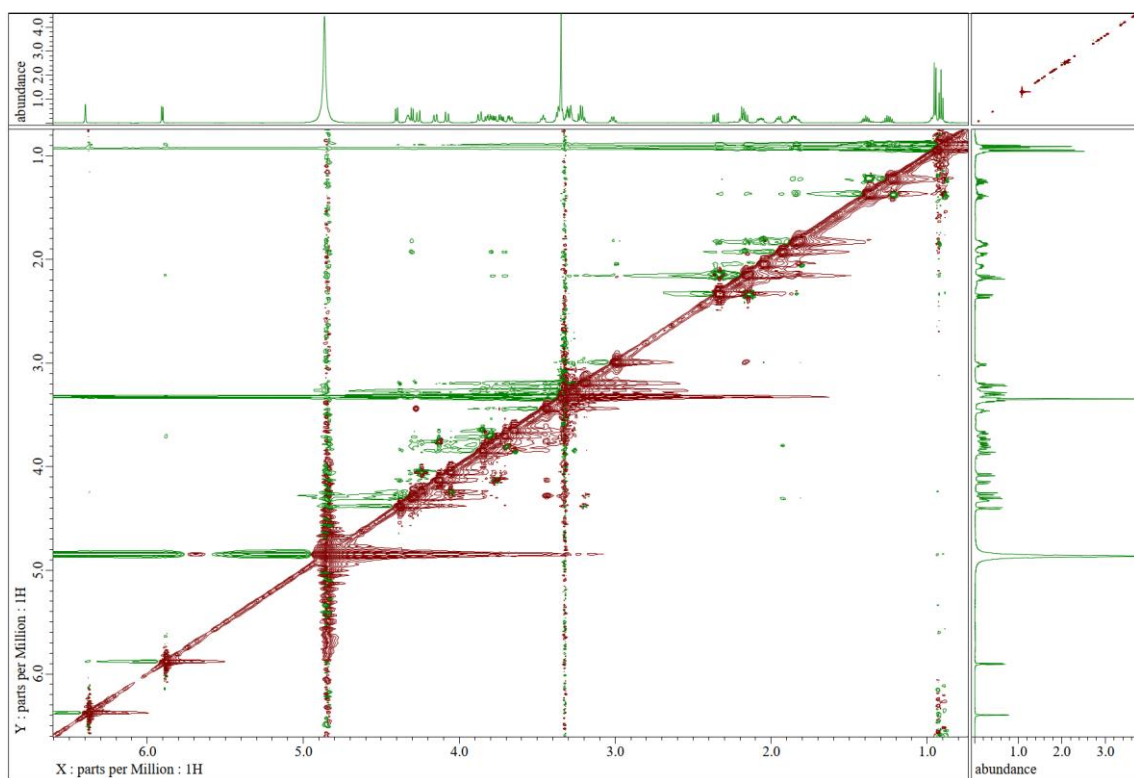

NOESY spectrum of 7

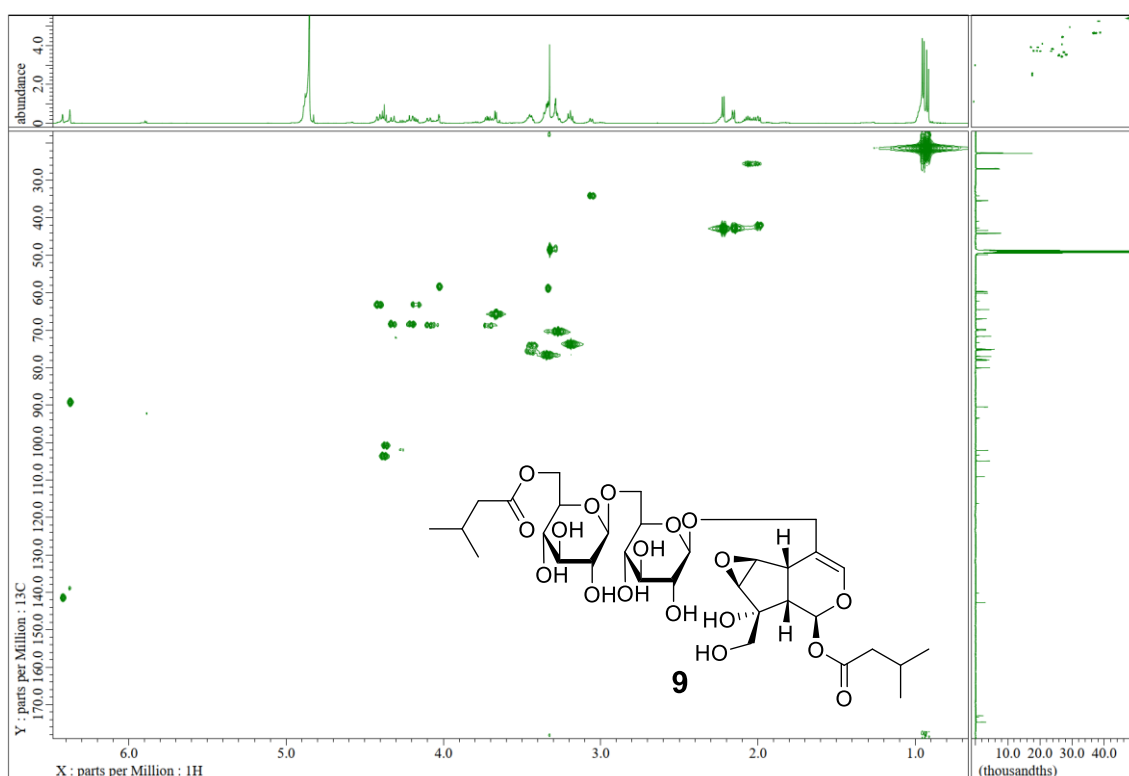

HMQC spectrum of **9**

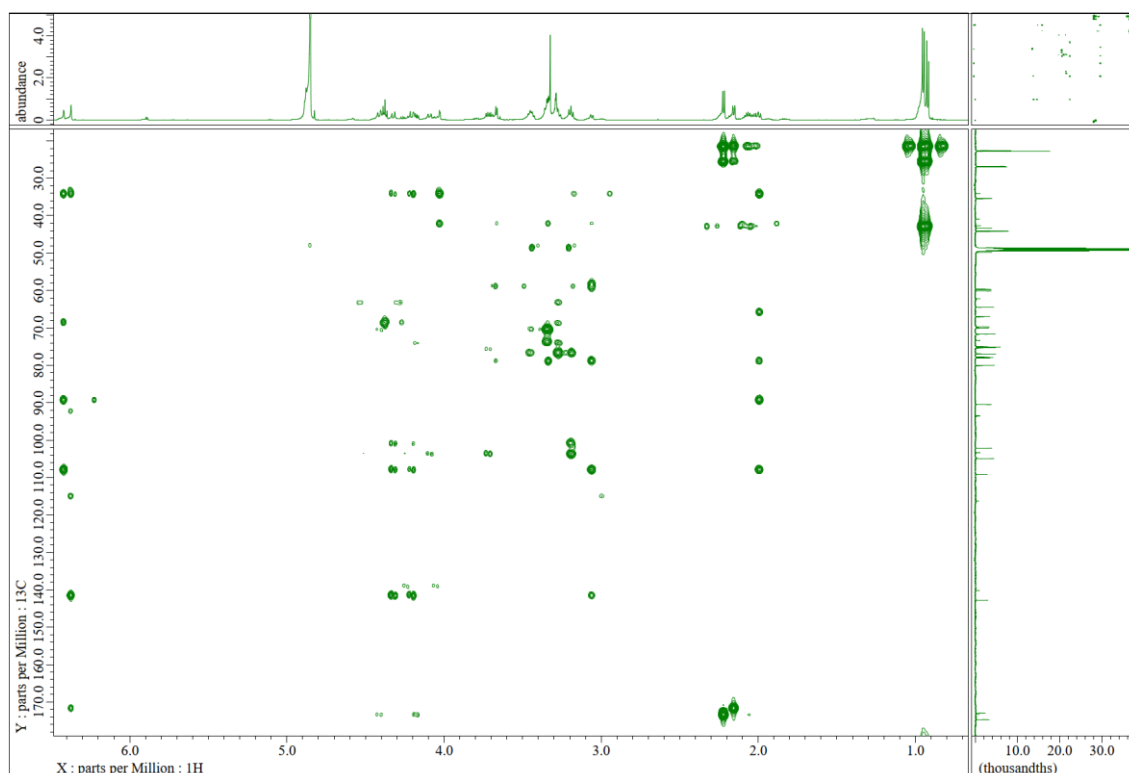

HMBC spectrum of **9**

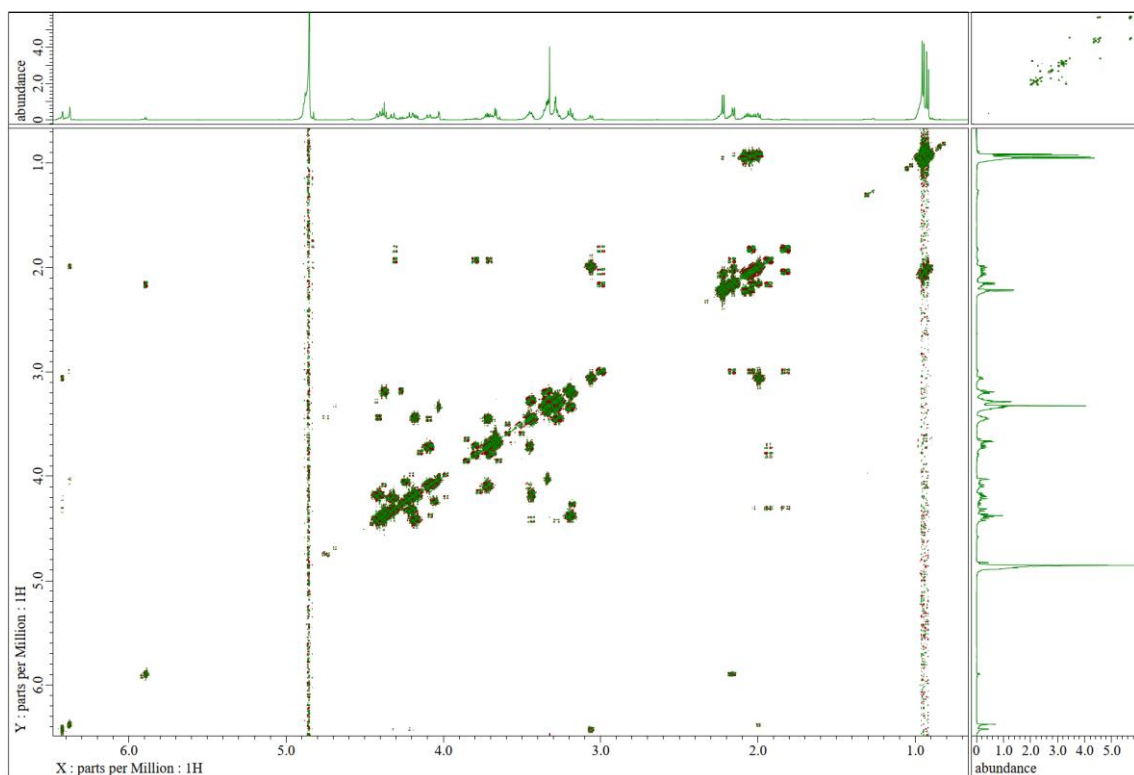

DQF spectrum of **9**

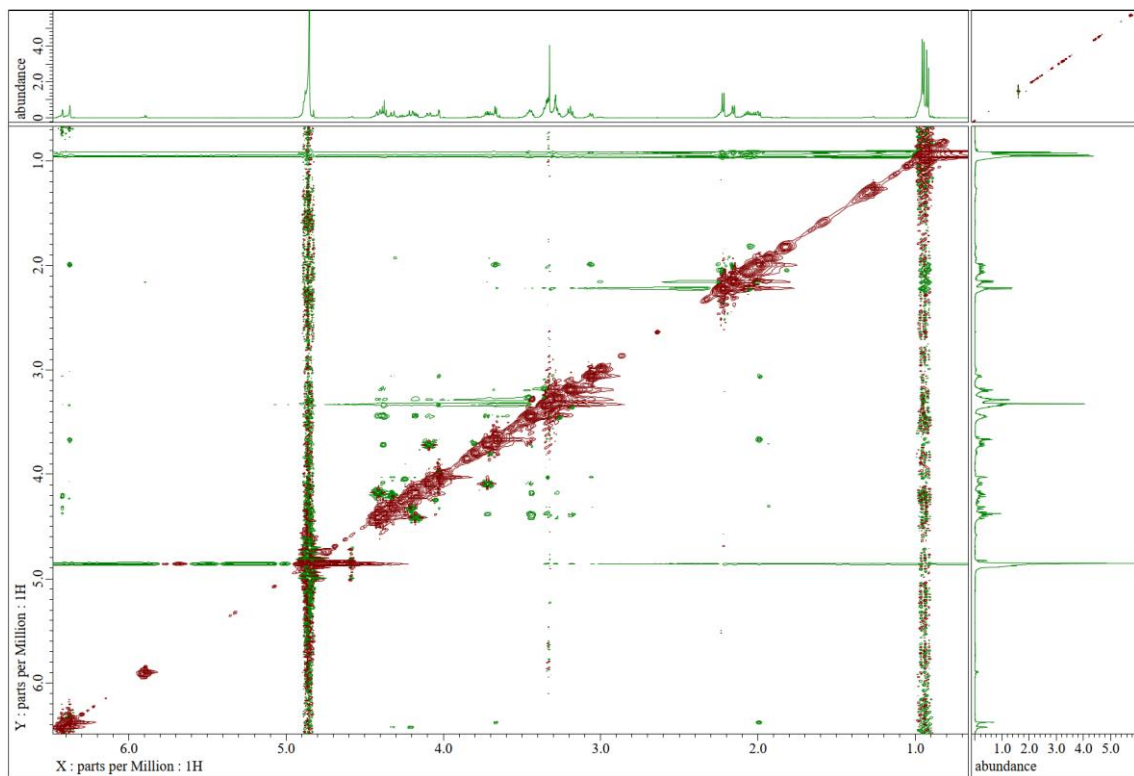

NOESY spectrum of **9**

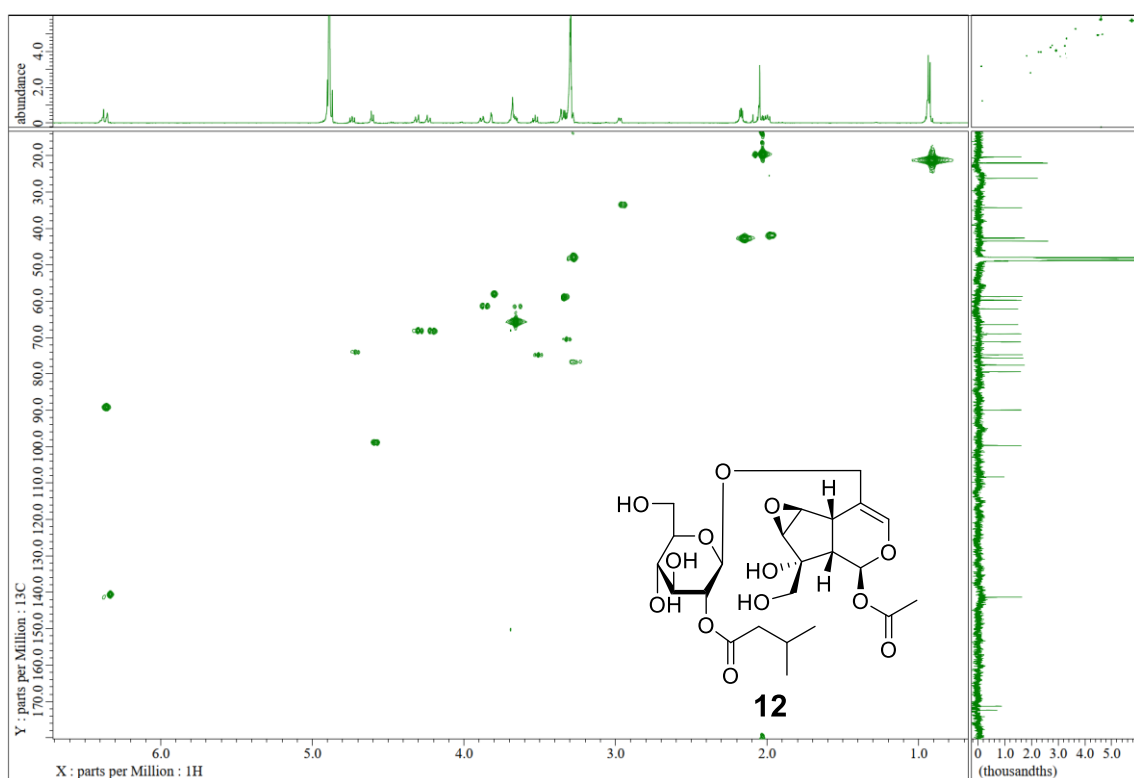

HMBC spectrum of **12**

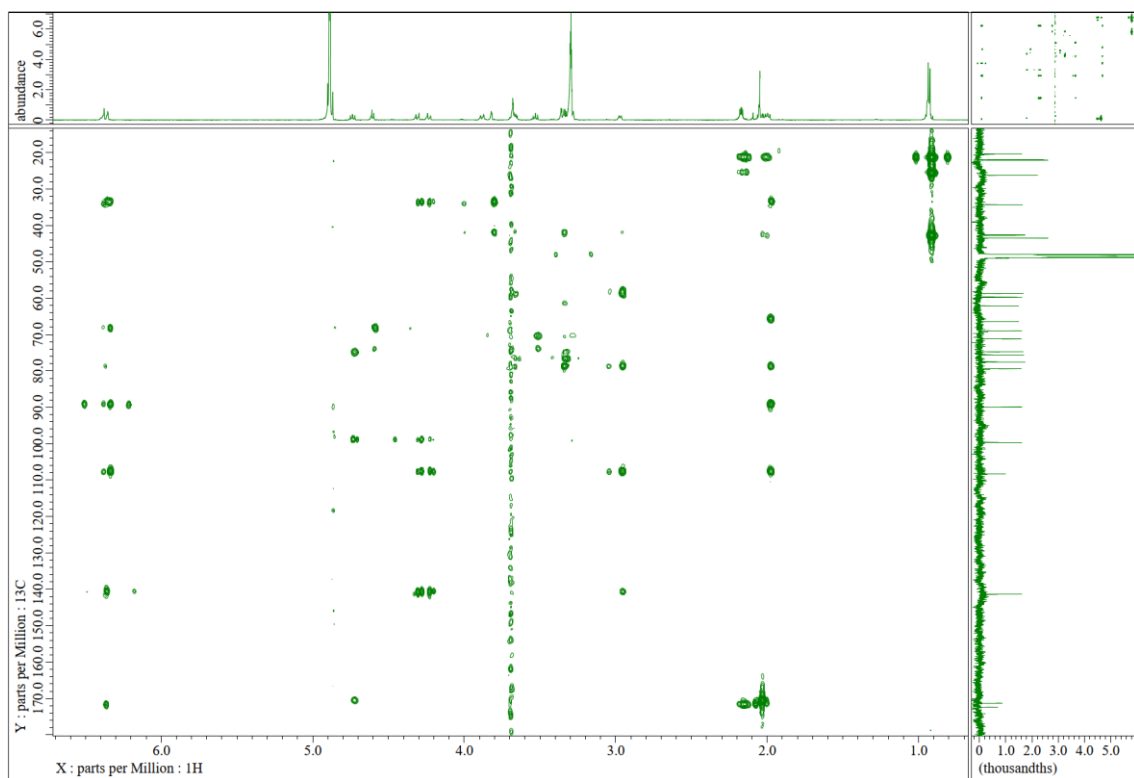

HMBC spectrum of **12**

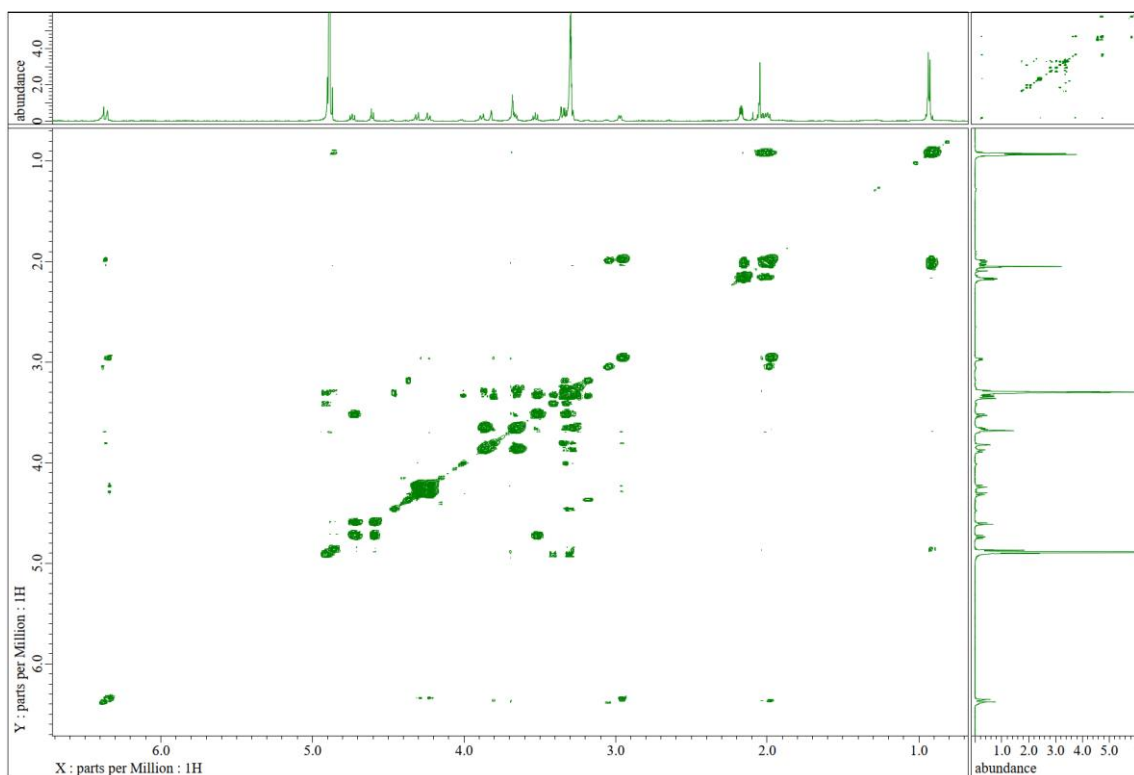

DQF spectrum of **12**

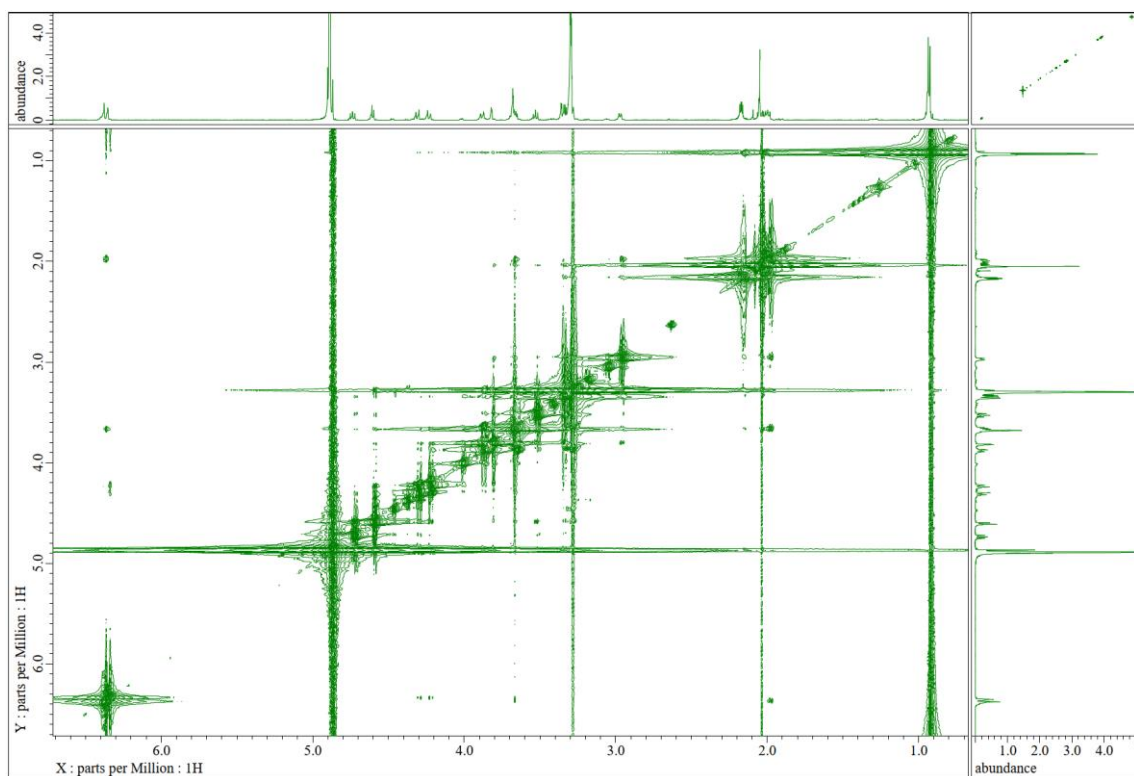

NOESY spectrum of **12**

**S4. Optimized geometries, the minimum value of frequency, relative free-energies, and Boltzmann distributions of conformers of 1a, 6a, and 9a.**

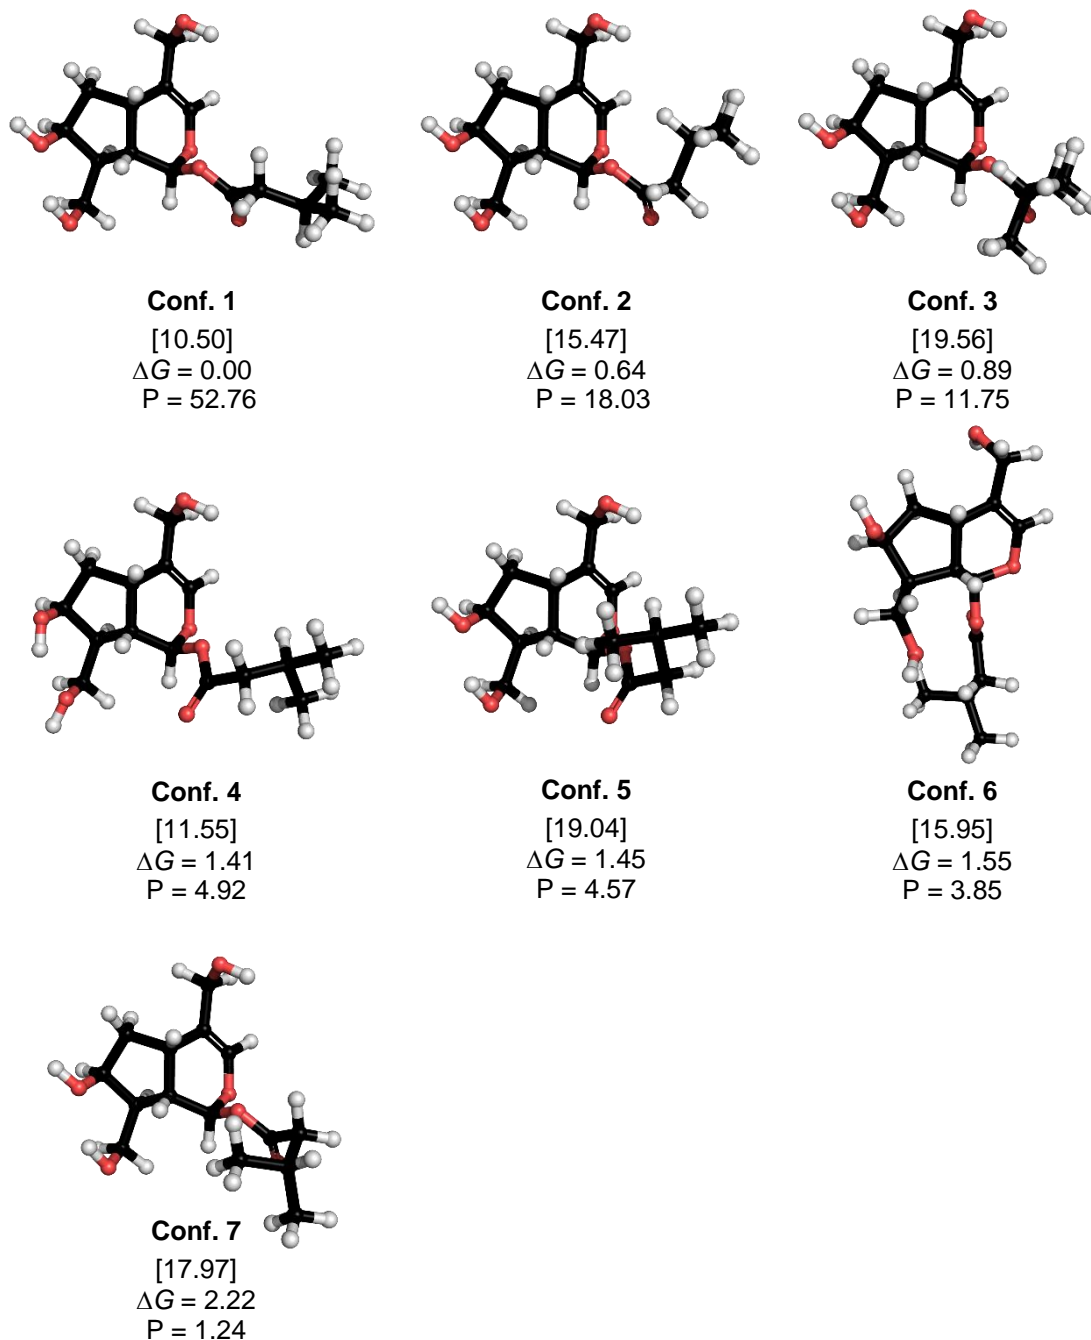

Figure S4-1 The optimized structures of 7 conformers of **1a** with the minimum value of frequency [in brackets,  $\text{cm}^{-1}$ ], relative free-energy ( $\Delta G$ , kcal/mol), and Boltzmann distribution ( $P$ , %), at 298.15 K, calculated at the CAM-B3LYP/def2-TZVP level in MeOH.

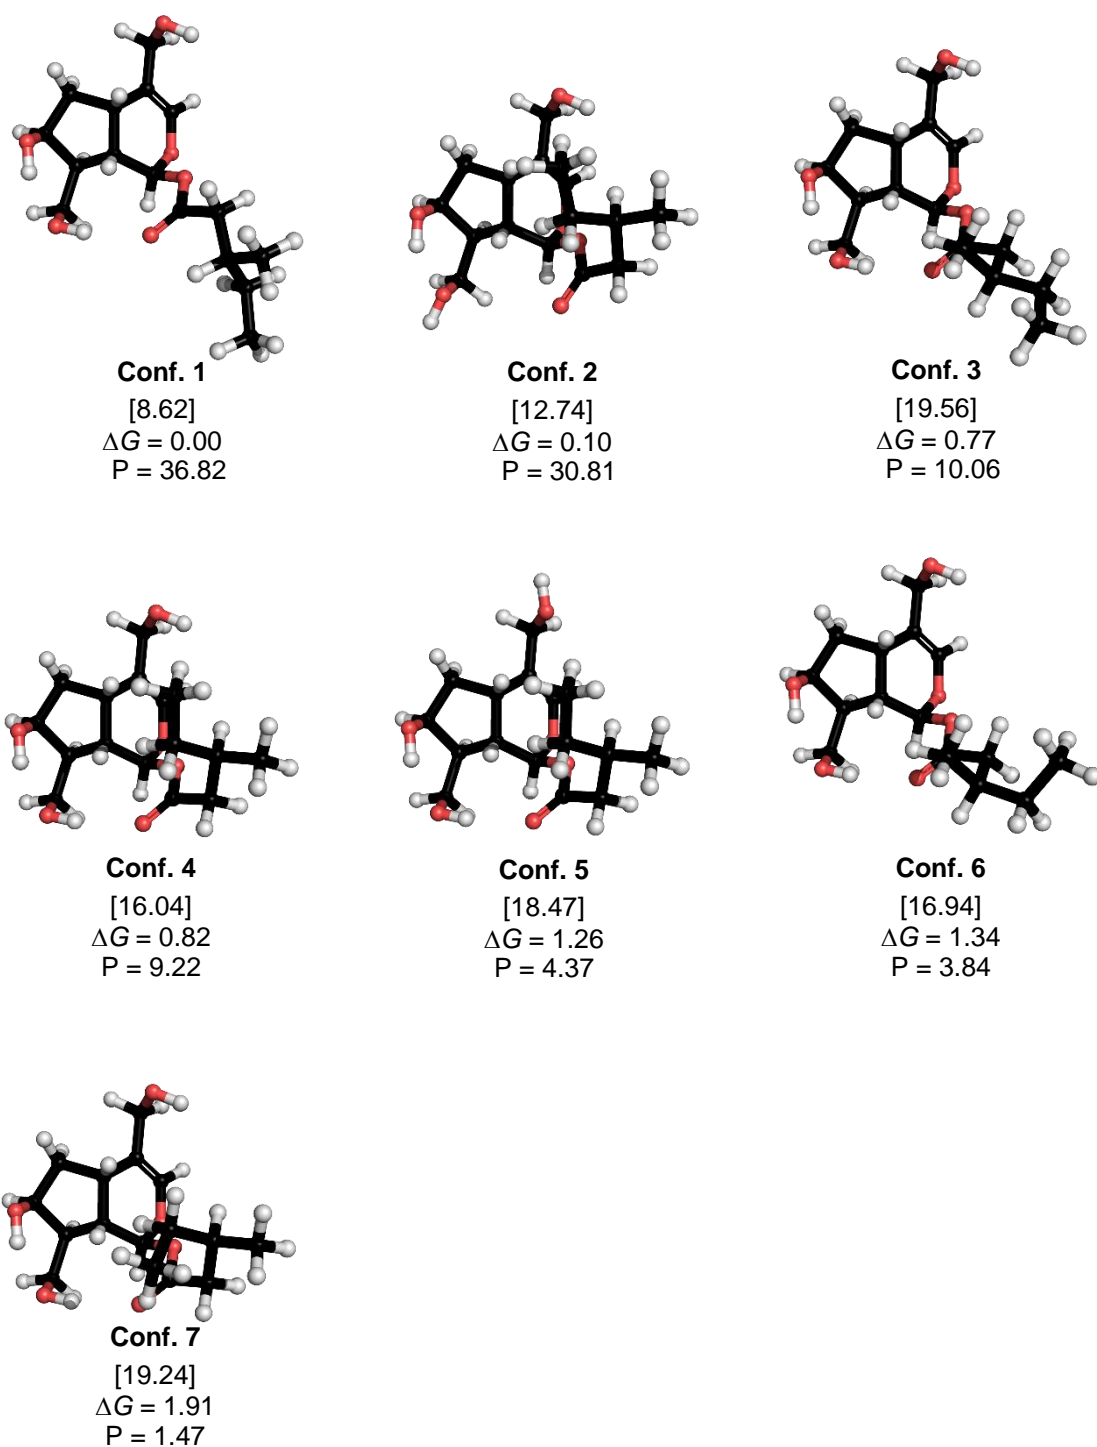

Figure S4-2 The optimized structures of 7 conformers of **6a** with the minimum value of frequency [in brackets, cm<sup>-1</sup>], relative free-energy ( $\Delta G$ , kcal/mol), and Boltzmann distribution (P, %), at 298.15 K, calculated at the CAM-B3LYP/def2-TZVP level in MeOH.

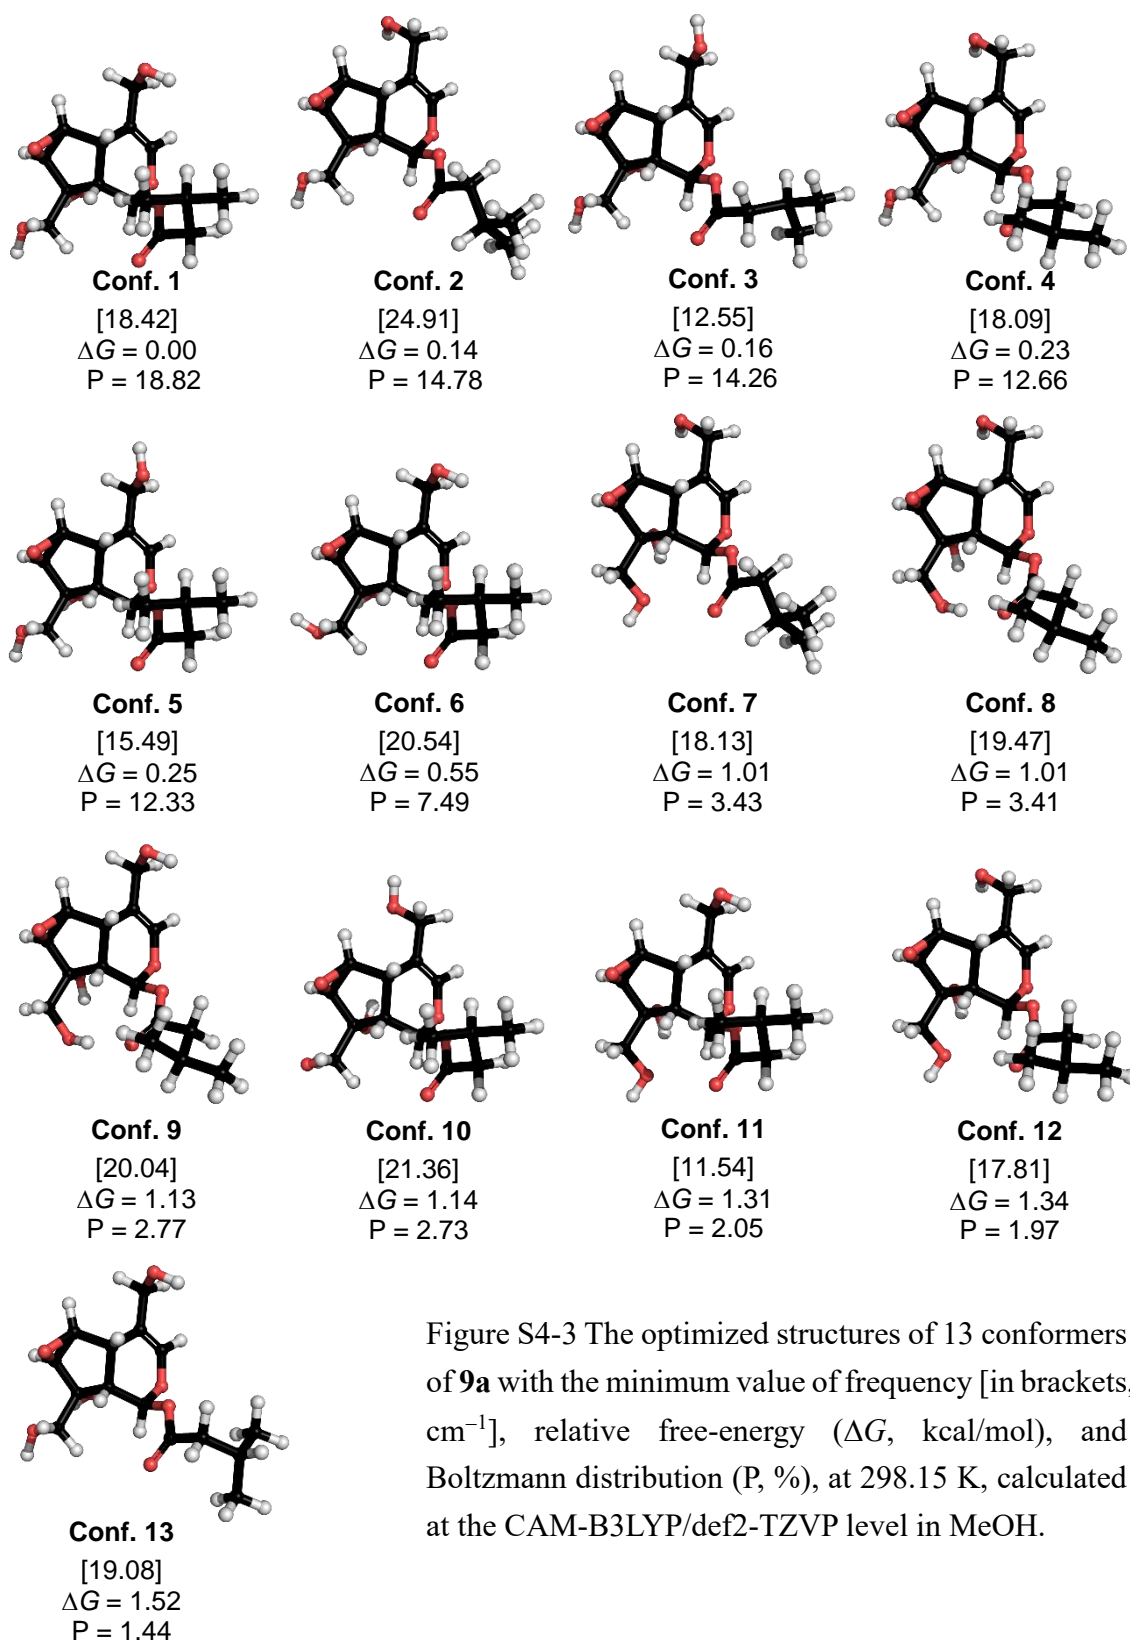

Figure S4-3 The optimized structures of 13 conformers of **9a** with the minimum value of frequency [in brackets, cm<sup>-1</sup>], relative free-energy (ΔG, kcal/mol), and Boltzmann distribution (P, %), at 298.15 K, calculated at the CAM-B3LYP/def2-TZVP level in MeOH.



**S5. Anti-proliferative activity of 1a, 6a, and 9a against non-CSCs and CSCs from MDA-MB-231 cells.**

**Table S5-1** Inhibition (%) of cell proliferation of **1a**, **6a**, and **9a** against non-CSCs (MDA-MB-231 cells). ADR (positive control) inhibited 27.9±6.7% at 0.05  $\mu$ M. Inhibition ratio (%) of relative cell proliferation are shown as means  $\pm$ SD of three replicates. Statistical significance was analyzed using the Dunnett's test (\* $P$  < 0.05, \*\* $P$  < 0.01).

| Compounds | Concentrations of test compounds ( $\mu$ M) |               |                  |                  |                   |                  |                  | IC <sub>50</sub> ( $\mu$ M) |
|-----------|---------------------------------------------|---------------|------------------|------------------|-------------------|------------------|------------------|-----------------------------|
|           | Control                                     | 20 $\mu$ M    | 40 $\mu$ M       | 60 $\mu$ M       | 80 $\mu$ M        | 100 $\mu$ M      | 120 $\mu$ M      |                             |
| <b>1a</b> | 0 $\pm$ 5.7                                 | -             | -                | 16.0 $\pm$ 4.3*  | 38.8 $\pm$ 10.8** | 48.6 $\pm$ 6.8** | 72.3 $\pm$ 1.7** | > 100                       |
| <b>6a</b> | 0 $\pm$ 6.0                                 | 4.2 $\pm$ 4.8 | 38.5 $\pm$ 3.3** | 64.3 $\pm$ 3.6** | 79.2 $\pm$ 3.6**  | 77.7 $\pm$ 3.0** |                  | 47.7 $\pm$ 4.2              |
| <b>9a</b> | 0 $\pm$ 5.7                                 | -             | -                | 8.7 $\pm$ 11.4   | 46.5 $\pm$ 6.8**  | 30.3 $\pm$ 3.6** | 70.9 $\pm$ 5.3** | > 100                       |

**Table S5-2** Inhibition (%) of cell proliferation of **1a**, **6a**, and **9a** against CSCs from MDA-MB-231 cells. ADR (positive control) inhibited 50.3±2.4% at 0.05  $\mu$ M. Inhibition ratio (%) of relative cell proliferation are shown as means  $\pm$ SD of three replicates. Statistical significance was analyzed using the Dunnett's test (\* $P$  < 0.05, \*\* $P$  < 0.01).

| Compounds | Concentrations of test compounds ( $\mu$ M) |                  |                  |                  |                  |                  |                  | IC <sub>50</sub> ( $\mu$ M) |
|-----------|---------------------------------------------|------------------|------------------|------------------|------------------|------------------|------------------|-----------------------------|
|           | Control                                     | 10 $\mu$ M       | 20 $\mu$ M       | 40 $\mu$ M       | 60 $\mu$ M       | 80 $\mu$ M       | 100 $\mu$ M      |                             |
| <b>1a</b> | 0 $\pm$ 5.9                                 | -                | -                | 37.4 $\pm$ 6.9** | 70.5 $\pm$ 2.1** | 93.3 $\pm$ 2.2** | 94.3 $\pm$ 0.1** | 45.0 $\pm$ 5.3              |
| <b>6a</b> | 0 $\pm$ 1.2                                 | 16.2 $\pm$ 3.6** | 60.4 $\pm$ 1.9** | 84.3 $\pm$ 1.2** | 96.5 $\pm$ 0.4** | 98.6 $\pm$ 0.2** | 98.1 $\pm$ 4.6** | 17.6 $\pm$ 1.0              |
| <b>9a</b> | 0 $\pm$ 5.9                                 | -                | -                | 38.1 $\pm$ 6.1** | 55.8 $\pm$ 1.0** | 91.8 $\pm$ 2.5** | 98.5 $\pm$ 0.3** | 47.7 $\pm$ 3.9              |
